# Supplementary material for: Microgeographic variation in body condition of three Mexican garter snakes in central Mexico
Source: PeerJ. 2019 Mar 13;7:e6601. doi: 10.7717/peerj.6601 (PMC6420799; doi:10.7717/peerj.6601)
Supplement: Supplemental Information 1 [file peerj-07-6601-s001.xlsx]

## Sheet: eques
number snake	localidad asignada	Especie	DAY	MONTH	YEAR	Sex	Size category	SVL (cm)	Tail length (cm)	snout length (mm)	head length (mm)	head wide	mass (gr.)
868	Lerma	T. eques	19	9	2000	1	1	17	4.8		11.4	5.6	2.64
877	Lerma	T. eques	19	9	2000	1	1	18.5	4.5		17	5	2.64
878	Lerma	T. eques	19	9	2000	1	1	17.5	5		12	5.5	2.64
873	Lerma	T. eques	19	9	2000	1	1	17.7	4.7		11.3	5.6	2.72
871	Lerma	T. eques	19	9	2000	1	1	18	5.2		12	5.7	2.79
870	Lerma	T. eques	19	9	2000	1	1	18	5.1		11.4	5.6	2.87
867	Lerma	T. eques	19	9	2000	1	1	16.5	4.5		11.4	6.2	2.91
874	Lerma	T. eques	19	9	2000	2	1	17.4	4.4		12	5.9	2.94
872	Lerma	T. eques	19	9	2000	1	1	17	5.1		11.6	5.9	3.06
864	Lerma	T. eques	19	9	2000	1	1	17.5	4.5		0.85	6.2	3.1
875	Lerma	T. eques	19	9	2000	1	1	17.7	5		11.5	5.2	3.15
869	Lerma	T. eques	19	9	2000	1	1	19	5.7		12	5.8	3.18
865	Lerma	T. eques	19	9	2000	1	1	17.7	4.7		0.73	6.2	3.23
876	Lerma	T. eques	19	9	2000	1	1	17	5		11.5	5.5	3.24
866	Lerma	T. eques	19	9	2000	1	1	17.3	5.1		10	6	3.87
970	Lerma	T. eques	11	5	2001	2	1	29	7.4		16	9	8.12
1005	Lerma	T. eques	20	5	2001	1	1	34	9		13.8	8.52	13.12
894	Lerma	T. eques	14	4	2001	2	1	32	9.5		12.3	9.4	14.52
1088	Lerma	T. eques	26	4	2002		1	28	7		16.57	7.32	16.43
1093	Lerma	T. eques	26	4	2002	2	1	34.4	80		14.91	9.5	16.86
1015	Lerma	T. eques	20	5	2001	2	1	33	8		13.9	8.5	17
1090	Lerma	T. eques	26	4	2002	2	1	34.5	10		14.18	7.49	17.5
896	Lerma	T. eques	14	4	2001	2	2	76.5	12.5		29.3	19.2	20.3
1017	Lerma	T. eques	20	5	2001	1	2	44.5	12.5		13.5	8.9	25.04
897	Lerma	T. eques	14	4	2001	1	2	41.5	9.4		19.6	9.4	27.44
964	Lerma	T. eques	11	5	2001	1	2	45	12.5		14	10	29.94
976	Lerma	T. eques	20	5	2001	2	2	43	12		14.9	11.2	30.83
1167	Lerma	T. eques	30	5	2003	2	2	40	11		17.05	9.72	31.58
960	Lerma	T. eques	11	5	2001	1	2	47	12		13	11.6	35.92
1018	Lerma	T. eques	20	5	2001	1	2	46.5	11		15.5	2	36.61
1068	Lerma	T. eques	8	6	2001	1	2	52.5	15		17.5	12.1	36.87
941	Lerma	T. eques	1	5	2001	2	2	48.5	13.4		16	12	37.9
904	Lerma	T. eques	27	4	2001	1	2	48.5	9.5		12	6	38.7
1007	Lerma	T. eques	11	5	2001	1	2	49	7.5		15.2	13	41.6
1034	Lerma	T. eques	8	6	2001	1	2	49	13.5		17.9	11.3	41.91
963	Lerma	T. eques	11	5	2001	1	2	49.5	9		14.6	11.4	42.2
1065	Lerma	T. eques	8	6	2001	1	2	57.5	9.5		22.7	14.9	42.86
1049	Lerma	T. eques	8	6	2001	1	2	51	2		19.6	12.4	43.64
1067	Lerma	T. eques	8	6	2001	1	2	49.5	13.5		17.1	12.2	44.12
962	Lerma	T. eques	11	5	2001	1	2	53.5	13		16.4	12.2	45.37
1056	Lerma	T. eques	8	6	2001	1	2	55	16		23.7	15.9	48.12
1064	Lerma	T. eques	8	6	2001	2	2	65	7.5		33.7	22.7	48.16
967	Lerma	T. eques	20	5	2001	2	2	53	12		17.2	13.2	48.56
1016	Lerma	T. eques	20	5	2001	1	2	55.5	16.5		15.9	10	48.67
1025	Lerma	T. eques	8	6	2001	1	2	48	13.5		14.7	13	49.43
1057	Lerma	T. eques	8	6	2001	1	2	55	5.5		19.9	11.5	49.61
1042	Lerma	T. eques	8	6	2001	1	2	50.5	15		16.6	15.9	50.03
961	Lerma	T. eques	11	5	2001	2	2	52	12		19.1	14.1	50.98
1013	Lerma	T. eques	20	5	2001	1	2	54	14.5		19.2	13.2	51.23
1160	Lerma	T. eques	30	5	2003	2	2	47	6		17.74	12.81	53.84
968	Lerma	T. eques	20	5	2001	2	2	64	15.5		20.5	16.2	54.1
969	Lerma	T. eques	20	5	2001	2	2	54	13		18.2	13.7	55.86
1008	Lerma	T. eques	20	5	2001	2	2	61	17		17.6	9.58	58
1063	Lerma	T. eques	8	6	2001	1	2	59	14		22.2	12.5	61.24
965	Lerma	T. eques	11	5	2001	1	2	55.5	16		15.5	12.7	61.8
977	Lerma	T. eques	20	5	2001	2	2	49	13		18.1	14.2	63.35
944	Lerma	T. eques	1	5	2001	2	2	49	11.6		20	17	66.7
1084	Lerma	T. eques	26	4	2002		1	22	3		30.76	16.44	67.39
982	Lerma	T. eques	20	5	2001	1	2	53.5	14		17.6	13.8	70.36
1014	Lerma	T. eques	20	5	2001	2	2	48.5	11		16	10.2	72.23
1054	Lerma	T. eques	8	6	2001	1	2	60	16		18.9	15.7	72.76
945	Lerma	T. eques	1	5	2001	2	2	50	7		18	17	73.45
1058	Lerma	T. eques	8	6	2001	1	2	59.3	13		20	13	80.19
1048	Lerma	T. eques	8	6	2001	2	2	53	8		19.8	12.1	82.73
1003	Lerma	T. eques	20	5	2001	1	2	60	14		19.1	15.9	85.61
916	Lerma	T. eques	27	4	2001	2	2	71.5	18				86.9
966	Lerma	T. eques	11	5	2001	2	2	57	14		17.4	13	89.74
907	Lerma	T. eques	27	4	2001	2	2	55.5	9.5		17.3	15	92.4
1158	Lerma	T. eques	30	5	2003	1	2	60	19		18.2	18.3	95.21
909	Lerma	T. eques	27	4	2001	1	2	60.5	14.5		19	16.3	108.3
1050	Lerma	T. eques	8	6	2001	2	2	59	13.5		21.7	13.1	108.7
1000	Lerma	T. eques	20	5	2001	2	2	64.5	14		21.9	17.5	109.72
1052	Lerma	T. eques	8	6	2001	2	2	59	14		20	13.5	111.08
1060	Lerma	T. eques	8	6	2001	2	2	61.5	7		23.6	13.1	111.12
914	Lerma	T. eques	27	4	2001	1	2	62	12.5				111.4
1070	Lerma	T. eques	8	6	2001	2	2	60	12		25.6	19	114.11
1053	Lerma	T. eques	8	6	2001	2	2	60	3.2		27.3	20.9	115.98
1079	Lerma	T. eques	26	4	2002		2	60	16		24.15	12.99	116.12
1143	Lerma	T. eques	7	4	2003	2	2	65	16		23.72	14.36	119.1
1062	Lerma	T. eques	8	6	2001	2	2	63	16		22.2	12.8	121.34
942	Lerma	T. eques	1	5	2001	2	2	60	14		27	23	124.49
1055	Lerma	T. eques	8	6	2001	2	2	61	8		33.4	22.6	128.03
1069	Lerma	T. eques	8	6	2001	2	2	60.5	14.5		22.6	14.7	130.24
920	Lerma	T. eques	27	4	2001	2	2	63	14.5				136.1
918	Lerma	T. eques	27	4	2001	2	2	64.5	12.5				139.5
912	Lerma	T. eques	27	4	2001	2	2	56.5	14.5				139.8
895	Lerma	T. eques	14	4	2001	2	2	70	15		24.3	12.4	141.37
1066	Lerma	T. eques	8	6	2001	2	2	66	9		30.1	19.2	147.16
1083	Lerma	T. eques	26	4	2002	2	2	59	8		24.98	14.67	153
1059	Lerma	T. eques	8	6	2001	2	2	66	16		31.5	31.2	158.35
899	Lerma	T. eques	14	4	2001	1	2	77.5	15.6		28	21	168.4
1061	Lerma	T. eques	8	6	2001	2	2	70	16		35.7	27.8	173.66
900	Lerma	T. eques	14	4	2001	2	2	67	5.1		25	19.6	184
1051	Lerma	T. eques	8	6	2001	2	2	74	10.5		37	23	218.83
943	Lerma	T. eques	1	5	2001	2	2	77	17		29	26	335.86
2208	Lerma	T. eques	10	8	2010	2	1	17	3.8	10.64	10.19	5.95	1.89
1637	Lerma	T. eques	30	8	2007	2	1	21	4.3		11.28	5.61	4.4
1638	Lerma	T. eques	30	8	2007	2	1	23	5.5		11.77	5.95	4.9
1655	Lerma	T. eques	24	10	2007	2	1	22.5	8		12.33	6.59	4.9
1477	Lerma	T. eques	1	10	2005	1	1	24	7.7		11.56	6.73	5.7
1686	Lerma	T. eques	6	11	2007	1	1	22	6		9.55	7.12	5.7
1679	Lerma	T. eques	21	10	2007	1	1	23	6		12.27	7.89	5.8
1677	Lerma	T. eques	19	10	2007	2	1	23	6		12.5	6.58	6.3
1639	Lerma	T. eques	30	8	2007	2	1	25.5	6.5		13.35	7.25	6.3
1657	Lerma	T. eques	26	10	2007	1	1	23	7		11.06	7.5	7.5
1653	Lerma	T. eques	20	10	2007	1	1	22	6		10.29	7.17	7.6
1656	Lerma	T. eques	26	10	2007	2	1	23	7		16.62	7.57	7.8
1671	Lerma	T. eques	18	10	2007	2	1	26	7		9.96	7.51	8.4
1675	Lerma	T. eques	19	10	2008	1	1	27	9		13.43	7.94	8.5
1678	Lerma	T. eques	20	10	2007	1	1	24	8		12.5	7.87	9.1
1676	Lerma	T. eques	19	10	2007	1	1	26	6		11.13	8.14	9.3
1652	Lerma	T. eques	5	10	2007	2	1	25	6		13.37	7.61	9.4
1635	Lerma	T. eques	15	8	2007	2	1	29	7.5		11.49	6.63	9.5
1683	Lerma	T. eques	6	11	2007	2	1	30	11		11.93	7.65	9.5
1690	Lerma	T. eques	8	11	2007	1	1	27	7		12.78	8.63	9.5
1636	Lerma	T. eques	15	8	2007	1	1	26.5	7		11.61	7.05	9.6
1674	Lerma	T. eques	18	10	2008	2	1	27	6		11.64	8.13	9.8
1685	Lerma	T. eques	6	11	2007	1	1	29	8		11.75	7.52	10
1634	Lerma	T. eques	15	8	2007	1	1	27	7		11.2	6.99	10.1
1682	Lerma	T. eques	5	11	2007	1	1	28	8		13.14	8.63	10.3
1684	Lerma	T. eques	6	11	2007	2	1	29	8		12.6	7.5	10.5
2207	Lerma	T. eques	10	8	2010	1	1	28		11.5	14.93	7.89	10.79
1654	Lerma	T. eques	21	10	2007	1	1	28	9		13.07	7.58	10.9
1252	Lerma	T. eques				1	2	40.05	42.05		12.02	9.78	11.5
1681	Lerma	T. eques	5	11	2007	2	1	29	7		11.14	7.75	12.1
1633	Lerma	T. eques	15	8	2007	1	1	30.5	6.5		13.17	8.48	13.3
1640	Lerma	T. eques	30	8	2007	2	1	32	7		12.31	9.3	13.5
1251	Lerma	T. eques				2	1	31.5	8		11.9	9.24	14.3
1632	Lerma	T. eques	15	8	2007	1	1	29	7.5		12.4	10.22	17.2
1283	Lerma	T. eques				1	1	34	11		13.17	9.3	20.41
1253	Lerma	T. eques				2	2	39.5	10		14.53	11.05	22.4
1672	Lerma	T. eques	18	10	2007	2	2	39	8		16.7	11.27	26.8
1817	Lerma	T. eques	13	9	2008	1	2	39	11.5		13.66	8.6	26.8
1648	Lerma	T. eques	5	10	2007	1	2	39	10.5		13.1	9.15	29.2
1293	Lerma	T. eques				1	2	42	12.5		14.99	9.37	29.76
1295	Lerma	T. eques				1	2	46.5	11		17.9	10.11	30.23
1245	Lerma	T. eques				1	2	41.5	13		14.07	13	30.68
1649	Lerma	T. eques	5	10	2007	1	2	41.5	11		11.39	9.33	31.2
1821	Lerma	T. eques	13	9	2008	1	2	39	9		16.83	9.5	31.6
1673	Lerma	T. eques	18	10	2007	1	2	39	9		10.52	10.14	31.7
1689	Lerma	T. eques	8	11	2007	1	1	25	7		15.72	7.83	32
1294	Lerma	T. eques				1	2	47	13.5		17.91	10.37	33.96
1814	Lerma	T. eques	13	9	2008	1	2	45	11		12.44	10.2	35.5
1249	Lerma	T. eques				2	2	58.2	11.5		14.91	13.32	37.56
1291	Lerma	T. eques				1	2	51.3	13.2		16.9	12.32	39.01
1284 (2)	Lerma	T. eques	24	5	2005	2	2	50.1	12.2		18.98	12.6	39.8
1362	Lerma	T. eques	1	7	2005	2	2	51.6	15.7		20.62	14.4	41.1
1296	Lerma	T. eques				1	2	52.5	16		16.3	11.52	42.19
1247	Lerma	T. eques				1	2	46	13.5		19.09	11.5	44.36
1281 (2)	Lerma	T. eques	24	5	2005	2	2	55	11		17.28	11.58	44.4
1281	Lerma	T. eques				1	2	49	16		17.65	9.99	44.84
1248	Lerma	T. eques				1	2	70.3	6.2		19.76	12.3	47.7
1287	Lerma	T. eques				1	2	56.5	15.6		16.51	12.8	49.24
1688	Lerma	T. eques	8	11	2007	2	1	35	16		17.86	13.11	50
1285	Lerma	T. eques				1	2	52.5	14		18.44	11.45	51.04
1279	Lerma	T. eques				1	2	56.8	14.5		15.95	16.57	52.85
1289	Lerma	T. eques				1	2	55.6	16.5		19.9	13.84	54.5
1283 (2)	Lerma	T. eques	24	5	2005	2	2	53.2	12.3		20	15.26	56.4
1297	Lerma	T. eques				2	2	53.5	12.5		18.7	11.89	57.1
1631	Lerma	T. eques	15	8	2007	2	2	54	12		21.99	11.68	57.3
1325	Lerma	T. eques	27	6	2005	1	2	52	14		25.8	17.37	60.8
1286	Lerma	T. eques				1	2	56	17.5		23.74	11.95	61.53
1288	Lerma	T. eques				2	2	46	12		20.29	13.04	61.75
1822	Lerma	T. eques	13	9	2008	1	2	57	12		26.42	12.28	65.2
1680	Lerma	T. eques	5	11	2007	2	1	35	16		26.65	13.11	67.2
1282	Lerma	T. eques				2	2	60	13			17.9	71.9
1284	Lerma	T. eques				1	2	61	16.5			15.4	72.64
1280	Lerma	T. eques				2	2	61.5	14.2			16.14	73.92
1278	Lerma	T. eques				1	2	58.5	11.7			13.77	83.5
1812	Lerma	T. eques	13	9	2008	2	2	64	9			12.46	85
1687	Lerma	T. eques	22	10	2007	2	2	66	12			16.4	86
1650	Lerma	T. eques	5	10	2007	2	2	66	19			14.33	90.4
1651	Lerma	T. eques	5	10	2007	1	2	60	14			13.34	118.8
1820	Lerma	T. eques	13	9	2008	1	2	69	15			13.9	136
1819	Lerma	T. eques	13	9	2008	1	2	80	14			15.42	137.15
1818	Lerma	T. eques	13	9	2008	1	2	72	17			12.7	138.3
1290	Lerma	T. eques				2	2	66.5	10.3			18.03	144.86
1246	Lerma	T. eques				2	2	69	10			15.4	196.21
1331	Lerma	T. eques				2	2	80	13			22.5	298.7
1292	Lerma	T. eques				2	2	80	0.6			27.54	325.92
1189	Cerrillo	T. eques	2	7	2003		1	13.9	3.4		9.47	4.51	1.4
1190	Cerrillo	T. eques	2	7	2003		1	12.8	3.7		10.73	4.5	1.4
1191	Cerrillo	T. eques	2	7	2003		1	13.5	3.6		8.91	4.5	1.4
1192	Cerrillo	T. eques	2	7	2003		1	12.51	3.7		10.6	4.52	1.4
1194	Cerrillo	T. eques	2	7	2003		1	13.3	3.8		10.5	4.5	1.4
1195	Cerrillo	T. eques	2	7	2003		1	13.6	3.7		10.3	4.5	1.4
1193	Cerrillo	T. eques	2	7	2003		1	14	3.9		11.01	4.8	1.41
1178	Cerrillo	T. eques	11	6	2003	2	2	53.2	12		19.8	10.96	13.73
879	Cerrillo	T. eques	12	9	2000	1	1	37.5	10.5		18	12	25.41
933	Cerrillo	T. eques	31	4	2001	1	2	45.5	12				29.9
880	Cerrillo	T. eques	12	9	2000	1	2	42.5	10.3		19	16	34.36
886	Cerrillo	T. eques	15	11	2000	2	2	41	13		15	9	40.7
1179	Cerrillo	T. eques	11	6	2003	2	2	42.1	11		14.57	9.87	43.58
1186	Cerrillo	T. eques	11	6	2003	2	2	39.5	15		16.3	8.71	46.22
1185	Cerrillo	T. eques	11	6	2003	2	1	38	9		17.78	10.28	51.07
1182	Cerrillo	T. eques	11	6	2003	1	2	41.2	13		16.99	12.07	63.7
1072	Cerrillo	T. eques	25	4	2002	2	2	43.5	5		23.93	10.36	97.1
903	Cerrillo	T. eques	26	4	2001	2	2	52.5	13.5		19	14	97.7
1184	Cerrillo	T. eques	11	6	2003	2	2	53	8.5		21.26	16.38	141.7
1646	Cerrillo	T. eques	28	11	2007	2	1	28	7		7.6	6.6	8.9
1643	Cerrillo	T. eques	15	9	2007	2	2	40	10		16.31	9.1	24.2
1642	Cerrillo	T. eques	15	9	2007	2	2	40	12.5		14.45	9.67	25
1641	Cerrillo	T. eques	15	9	2007	2	2	48.5	13		17.24	9.72	36
1645	Cerrillo	T. eques	28	11	2007	1	2	50	7		18.83	12.75	47.1
1647	Cerrillo	T. eques	30	11	2007	2	2	52	13		18.98	11.07	47.1
1644	Cerrillo	T. eques	15	11	2007	2	2	52	13		17.8	11.17	48.1
1783	Cerrillo	T. eques	30	6	2008	2	2	48	12		16	12.71	51.7
1927	Cerrillo	T. eques				2	2	54.5	11		19.5	16.72	57.6
1787	Cerrillo	T. eques	30	6	2008	1	2	49	9			13.87	73.6
1298	Cerrillo	T. eques				2	2	60.2	9.2			15.82	112.76
1299	Cerrillo	T. eques				2	2	63.5	14.2			19.2	122.7
1788	Cerrillo	T. eques	30	6	2008	2	2	66	14			16.48	143.7
1943	Cuitzeo	T. eques				2	1	19.5	5.4		12.2	6.11	2.45
2200	Cuitzeo	T. eques	17	8	2010	1	1	21.1	6.1	10.66	10.31	5.58	3.65
2214	Cuitzeo	T. eques	16	3	2011	2	1	20.3	5.4	12.6	10.8	7.48	4.5
1356	Cuitzeo	T. eques	11	6	2005	1	1	21.5	7.2		10.01		4.53
2122	Cuitzeo	T. eques	21	10	2009	2	1	20.7	3.3	12.27	12.1	7.68	4.55
2210	Cuitzeo	T. eques	1	10	2010	2	1	21.8	5.8	11.36	10.82	7.09	4.67
1353	Cuitzeo	T. eques	11	6	2005	2	1	21.2	6.5		10.82		5.65
1793	Cuitzeo	T. eques	1	7	2008	1	1	25	7		10.42	8.34	6.4
1795	Cuitzeo	T. eques	1	7	2008	2	1	22	7		10.22	8.58	6.5
1794	Cuitzeo	T. eques	1	7	2008	1	1	22	6		12.87	8.59	7
1851	Cuitzeo	T. eques	24	10	2008		1	22	6		11.7	7.2	7.5
1852	Cuitzeo	T. eques	24	10	2008		1	23	5.5		10.13	7.8	7.8
1942	Cuitzeo	T. eques				2	1	19.5	7.6		12.03	8.65	7.8
1791	Cuitzeo	T. eques	1	7	2008	2	1	23	6.5		10.43	8.97	8.3
1792	Cuitzeo	T. eques	1	7	2008	2	1	25	8		11.5	8.42	9.3
1662	Cuitzeo	T. eques	5	9	2007	2	1	27	7		12.31	8.08	10.5
1790	Cuitzeo	T. eques	1	7	2008	1	1	27	8		13.89	9.16	10.5
1789	Cuitzeo	T. eques	1	7	2008	1	1	28	8		12.8	9.61	12.6
1756	Cuitzeo	T. eques	27	6	2008	2	1	26	8		12.84	8.22	13
2131	Cuitzeo	T. eques	25	3	2010	1	1	37	10	15.16	11.57	8.76	15.73
1837	Cuitzeo	T. eques	24	10	2008	2	1	31	7		13.85	6.8	16.71
1755	Cuitzeo	T. eques	27	6	2008	2	1	36	9		20.29	8.32	17.9
1268 (2)	Cuitzeo	T. eques	27	5	2005	2	1	16.2	4.2		15.1	10.47	19.9
1879	Cuitzeo	T. eques	16	1	2009	1	2	39.6	11		13.6	14.82	30.07
1271 (2)	Cuitzeo	T. eques	27	5	2005	2	1	38	13.5		15.8	12.57	30.9
1342	Cuitzeo	T. eques	10	6	2005	1	2	42	11.7		17.39	11.77	33.5
2140	Cuitzeo	T. eques	30	6	2010	2	2	51.5	14.4	21.05	16.3	10.66	36.9
1803	Cuitzeo	T. eques	4	9	2008	2	1	37.8	10.5		16.8	10.73	40
2189	Cuitzeo	T. eques	30	6	2010	2	2	48.8	8.9	19.11	14.85	9.88	44.09
1273 (2)	Cuitzeo	T. eques	27	5	2005	2	2	58.5	17.4		21.11	16.51	53.9
1274 (2)	Cuitzeo	T. eques	27	5	2005	2	2	56	16.3		22.59	18.01	61
1269 (2)	Cuitzeo	T. eques	27	5	2005	2	2	47.4	13		24.5	20.68	66.9
1276 (2)	Cuitzeo	T. eques	27	5	2005	2	2	48.8	12.7			16.5	77.9
1885	Cuitzeo	T. eques	16	1	2009	1	2	62.5	12.5				86.9
1266 (2)	Cuitzeo	T. eques	27	5	2005	2	1	22.8	5.8			14.66	99.7
1267 (2)	Cuitzeo	T. eques	27	5	2005	1	1	23.2	5.6			16.23	122.4
1265 (2)	Cuitzeo	T. eques	27	5	2005	2	1	29.5	7				206.1
1275 (2)	Cuitzeo	T. eques	27	5	2005	2	2	76	12.5			26.13	220.2
1270 (2)	Cuitzeo	T. eques	27	5	2005	1	2	76.3	16.6			21.13	231.6
1272 (2)	Cuitzeo	T. eques	27	5	2005	2	2	81.3	12.3			20.74	287.2
1277 (2)	Cuitzeo	T. eques	27	5	2005	1	2	78.5	11.5			19.96	321.8

## Sheet: melanogaster
number snake	localidad asignada	Especie	DAY	MONTH	YEAR	Sex	Size category	SVL (cm)	Tail length (cm)	snout length (mm)	head length (mm)	head wide	mass (gr.)
1453	Lerma	T. melanogaster			2005	1	1	14.5	3		10.32	5.9	2.1
1269	Lerma	T. melanogaster				2	1	18.3	5.2		10.81	3.9	5.17
1480	Lerma	T. melanogaster	15	10	2005	2	1	18	4.6		10.9	6.28	5.4
1422	Lerma	T. melanogaster	26	9	2005	1	1	21	6		12.44	5.73	6.1
1261	Lerma	T. melanogaster				2	1	23	5		9.73	6.73	6.14
1272	Lerma	T. melanogaster				2	1	24	6.4		12.22	4.5	6.63
1279 (2)	Lerma	T. melanogaster	24	5	2005	2	1	22.5	5		121.45	5.1	7.2
1421	Lerma	T. melanogaster	26	9	2005	1	1	23	5		12.62	6.96	7.5
1395	Lerma	T. melanogaster	26	8	2005	2	1	22	5		11.6	7.88	7.61
1809	Lerma	T. melanogaster	13	9	2008	2	1	27	7		11.54	6.61	8.8
1420	Lerma	T. melanogaster	26	9	2005	1	1	21	6		12.2	7.53	8.8
1286 (2)	Lerma	T. melanogaster	24	5	2005	1	1	25.5	5.5		11.47	7.72	9.2
1255	Lerma	T. melanogaster				1	1	24	5		11.56	6.67	9.69
1258	Lerma	T. melanogaster				2	1	27	6.5		10.5	6.12	10.2
1254	Lerma	T. melanogaster				2	1	27	5.7		12.44	8.83	10.72
1811	Lerma	T. melanogaster	13	9	2008		1	27	8		9.84	6.62	11
1396	Lerma	T. melanogaster	26	8	2005	1	1	26	7		11.46	7.11	11.33
1419	Lerma	T. melanogaster	26	9	2005	2	1	28	8		13.07	7	12
1810	Lerma	T. melanogaster	13	9	2008	2	1	27	7		15.92	7.24	12.81
1256	Lerma	T. melanogaster				2	2	33.5	6.5		14.3	9.58	13.6
1260	Lerma	T. melanogaster				1	2	33	7		13.92	6.9	13.7
1282 (2)	Lerma	T. melanogaster	24	5	2005	2	1	30.5	6		13.83	7.59	14.4
1262	Lerma	T. melanogaster				2	2	38.5	9		12.25	9.76	16.25
1816	Lerma	T. melanogaster	13	9	2008	1	1	31	6		14.02	7.25	17.2
1264	Lerma	T. melanogaster				2	2	41.5	10		16.02	7.4	19.34
1271	Lerma	T. melanogaster				1	2	37	11		11.31	5	19.87
1268	Lerma	T. melanogaster				1	2	37	11.3		13.9	5	22.07
1270	Lerma	T. melanogaster				1	2	34.6	10.9		14.01	5.1	22.21
1274	Lerma	T. melanogaster				1	2	36.5	10.5		12.54	7.5	22.8
1418	Lerma	T. melanogaster	26	9	2005	2	2	33	10		11.94	8.53	23.3
1277	Lerma	T. melanogaster				2	2	35.5	8.5		15.59	8	23.31
1280 (2)	Lerma	T. melanogaster	24	5	2005	2	2	36	7.5		13.49	1.74	23.4
1275	Lerma	T. melanogaster				1	2	35	7		12.14	7	23.95
1394	Lerma	T. melanogaster	26	8	2005	2	1	32	8		12.95	7.95	24.01
1273	Lerma	T. melanogaster				1	2	40	11		14.42	8	24.03
1259	Lerma	T. melanogaster				2	2	36	9		14.65	8.82	24.2
1424	Lerma	T. melanogaster	26	9	2005	2	2	35.5	8.5		13.7	7.23	25.1
1263	Lerma	T. melanogaster				2	2	35.5	10		14.26	6.8	25.5
1426	Lerma	T. melanogaster	26	9	2005	2	2	35	10		11.2	8.9	27.9
1813	Lerma	T. melanogaster	13	9	2008	1	2	38.5	9		17.42	7.2	29.4
1389	Lerma	T. melanogaster	26	8	2005	2	2	40	8.5		11.81	9.25	29.84
1276	Lerma	T. melanogaster				1	2	38	11		17.17	8	30.36
1423	Lerma	T. melanogaster	26	9	2005	1	2	36	8		18.4	7.7	30.9
1392	Lerma	T. melanogaster	26	8	2005	1	2	35	9		15.94	8.77	34.05
1390	Lerma	T. melanogaster	26	8	2005	1	2	44	11		17.38	9.48	34.48
1393	Lerma	T. melanogaster	26	8	2005	2	2	34	8		18.46	9.09	37.7
1290 (2)	Lerma	T. melanogaster	24	5	2005	2	2	41	8		24	9.72	40.2
1293 (2)	Lerma	T. melanogaster	25	5	2005	1	2	40	8		16.2	9.47	40.3
1250	Lerma	T. melanogaster				1	2	56.1	8		17.65	13.62	42.56
1267	Lerma	T. melanogaster				2	2	40.9	11		17.3	5	42.9
1435	Lerma	T. melanogaster	27	9	2005	1	2	41	12		17.01	11.97	45.9
1285 (2)	Lerma	T. melanogaster	24	5	2005	2	2	36	6		16.27	8.3	48.1
1427	Lerma	T. melanogaster	26	9	2005	1	2	48	13		19.08	8.62	52.1
1429	Lerma	T. melanogaster	27	9	2005	1	2	45	15		19.58	9.33	52.4
1266	Lerma	T. melanogaster				2	2	41	9.5		9.54	5	53.87
1437	Lerma	T. melanogaster	27	9	2005	2	2	45.5	12.5		17.48	12.16	55.1
1391	Lerma	T. melanogaster	26	8	2005	2	2	45	15		19.96	9.94	56.27
1428	Lerma	T. melanogaster	27	9	2005	1	2	38	18.5		18.55	9.35	57
1265	Lerma	T. melanogaster				2	2	40	11		16.18	5.5	59.17
1434	Lerma	T. melanogaster	27	9	2005	1	2	44.5	12		19.44	12.09	63.5
1436	Lerma	T. melanogaster	27	9	2005	1	2	48	7.5			14.8	63.5
1815	Lerma	T. melanogaster	13	9	2008	1	2	52	11		20.88	10	63.5
1433	Lerma	T. melanogaster	27	9	2005	2	2	49	11			12.36	68.5
1425	Lerma	T. melanogaster	26	9	2005	2	2	46	15			10.86	68.6
1291 (2)	Lerma	T. melanogaster	24	5	2005	2	2	39	10			8.31	69.2
1430	Lerma	T. melanogaster	27	9	2005	2	2	47	11			8.67	69.3
1292 (2)	Lerma	T. melanogaster	24	5	2005	2	2	54.6	6			9.46	76.4
1431	Lerma	T. melanogaster	27	9	2005	2	2	47				10.1	76.8
1257	Lerma	T. melanogaster				2	2	42	11.56			8.34	78.6
1287 (2)	Lerma	T. melanogaster	24	5	2005	2	2	49	16			4.22	85.9
1289 (2)	Lerma	T. melanogaster	24	5	2005	2	2	46	10			8.81	88.4
1432	Lerma	T. melanogaster	27	9	2005	1	2	55	16			11.17	97.7
1288 (2)	Lerma	T. melanogaster	24	5	2005	2	2	58	8			9.18	121.8
2029	Cuitzeo	T. melanogaster	18	8	2009	1	1	14.5	4.5	9.59	10.02	6.07	1.62
1926	Cuitzeo	T. melanogaster				2	1	16	4.5		10.21	5.8	1.67
2095	Cuitzeo	T. melanogaster	18	8	2009	2	1	14.5	4	11.27	10.37	6.23	1.76
1785	Cuitzeo	T. melanogaster	27	6	2008		1	17.7	4.2		10.83	4.1	1.9
2052	Cuitzeo	T. melanogaster	18	8	2009	1	1	15	4.5	9.64	9.6	5.34	1.91
2096	Cuitzeo	T. melanogaster	18	8	2009	1	1	15.3	4.7	8.96	10.46	5.7	1.93
1361	Cuitzeo	T. melanogaster	11	6	2005	2	1	15.5	4.4		9.8		1.96
2150	Cuitzeo	T. melanogaster	30	6	2010	2	1	14.7	3.8	10.15		4.99	2.1
1786	Cuitzeo	T. melanogaster	27	6	2008		1	19	4.5		10.19	5.04	2.2
2031	Cuitzeo	T. melanogaster	18	8	2009	2	1	15.5	3.9	10.47	10.46	6.15	2.2
1987	Cuitzeo	T. melanogaster	18	8	2009	2	1	16	4.6		9.7	5.58	2.21
2165	Cuitzeo	T. melanogaster	30	6	2010	2	1	14.4	3.8	10.31	10.59	5.46	2.22
1933	Cuitzeo	T. melanogaster				1	1	17.5	4		9.66	5.7	2.27
1335	Cuitzeo	T. melanogaster	10	6	2005	1	1	16	5.5		10.43	5.05	2.3
1515	Cuitzeo	T. melanogaster	22	6	2006	2	1	24	6		9.07	5.76	2.3
1944	Cuitzeo	T. melanogaster	18	8	2009	1	1	16.5	4.7		9.6	7.15	2.307
1925	Cuitzeo	T. melanogaster				2	1	18.5	5		11.42	5.6	2.32
1932	Cuitzeo	T. melanogaster				2	1	16.5	4.4		10.7	5.82	2.35
2144	Cuitzeo	T. melanogaster	30	6	2010	2	1	15.4	4.1	10.42	10.32	5.22	2.4
1542	Cuitzeo	T. melanogaster	22	6	2006	1	1	19	6.5		11.17	5.35	2.5
1770	Cuitzeo	T. melanogaster	27	6	2008		1	19.5	5.2		16.2	4.6	2.5
2204	Cuitzeo	T. melanogaster	30	6	2010	1	1	15.7	4.5	7.65	11.05	5.43	2.55
2094	Cuitzeo	T. melanogaster	18	8	2009	2	1	18	5.3	9.53	10.2	6.1	2.58
1520	Cuitzeo	T. melanogaster	22	6	2006	2	1	26	8		10.66	5.59	2.6
1559	Cuitzeo	T. melanogaster				2	1	24.2	6.2		10.21	5.12	2.6
1784	Cuitzeo	T. melanogaster	27	6	2008		1	19.5	4.5		10.27	4.8	2.6
2025	Cuitzeo	T. melanogaster	18	8	2009	1	1	17.8	5	9.27	12.55	5.95	2.62
2205	Cuitzeo	T. melanogaster	30	6	2010	1	1	16.2	4.2	6.88	10.67	4.84	2.63
1955	Cuitzeo	T. melanogaster	18	8	2009	1	1	16.8	5.6		10.9	6.26	2.662
1997	Cuitzeo	T. melanogaster	18	8	2009	1	1	18	5.4	9.87	11.4	5.65	2.68
1728	Cuitzeo	T. melanogaster				2	1	18.5	4		9.72	5.19	2.7
1743	Cuitzeo	T. melanogaster					1	20.5	5.5		10.49	5.6	2.7
1748	Cuitzeo	T. melanogaster	6	6	2008		1	20	4.3			4.7	2.7
1781	Cuitzeo	T. melanogaster	27	6	2008		1	19.5	4.5		10.22	4.6	2.7
2084	Cuitzeo	T. melanogaster	18	8	2009	2	1	17.4	4.9	11.15	10.3	5.48	2.7
2203	Cuitzeo	T. melanogaster	30	6	2010	1	1	15.6	4.4	8.35	10.33	5.29	2.74
2168	Cuitzeo	T. melanogaster	30	6	2010	2	1	16.5	5.6	9.64	11.15	6.2	2.75
1990	Cuitzeo	T. melanogaster	18	8	2009	1	1	17.5	4.5	10.79	10.38	5.38	2.78
1940	Cuitzeo	T. melanogaster				2	1	18	5.1		11.4	4.73	2.79
1332	Cuitzeo	T. melanogaster	10	6	2005	2	1	17	6		10.86	5.3	2.8
1735	Cuitzeo	T. melanogaster					1	20.5	4.5		10.19	5.38	2.8
1950	Cuitzeo	T. melanogaster	18	8	2009	1	1	17.5	4.5		10.84	7.01	2.876
1366	Cuitzeo	T. melanogaster	8	7	2005	2	1	17	5		10.8	5.36	2.9
1754	Cuitzeo	T. melanogaster	6	6	2008		1	19.3	5		10.47	5.7	2.9
2083	Cuitzeo	T. melanogaster	18	8	2009	2	1	18.2	5.1	11.84	9.61	5.87	2.93
1995	Cuitzeo	T. melanogaster	18	8	2009	2	1	18.5	4.9	10.97	10.09	6.19	2.95
2093	Cuitzeo	T. melanogaster	18	8	2009	1	1	19.6	5.6	10.99	10.4	6.47	2.95
1923	Cuitzeo	T. melanogaster				2	1	18.5	5		10.62	5.6	2.99
2161	Cuitzeo	T. melanogaster	30	6	2010	1	1	17.5	5.1	9.6	10.42	5.65	2.99
1541	Cuitzeo	T. melanogaster	22	6	2006	1	1	21.5	6.5		9.6	5.34	3
1718	Cuitzeo	T. melanogaster				2	1	20.2	4.3		10.7	5.7	3
1730	Cuitzeo	T. melanogaster				2	1	19.2	4.7		8.6	6.6	3
1736	Cuitzeo	T. melanogaster					1	22.2	5		10.91	5.07	3
1740	Cuitzeo	T. melanogaster					1	20.5	5.2		9.68	6	3
1741	Cuitzeo	T. melanogaster					1	18.5	3.9		9.91	5.1	3
1753	Cuitzeo	T. melanogaster	6	6	2008		1	19.7	4		10.33	5	3
2092	Cuitzeo	T. melanogaster	18	8	2009	2	1	19	5.7	11.08	11.09	6.36	3.06
1994	Cuitzeo	T. melanogaster	18	8	2009	1	1	18	5.8	10.79	11.21	6.98	3.08
1336	Cuitzeo	T. melanogaster	10	6	2005	2	1	18	5.5		10.91	5.35	3.1
1747	Cuitzeo	T. melanogaster	6	6	2008		1	19.8	4.5		10.39	5.14	3.1
1941	Cuitzeo	T. melanogaster				2	1	19.5	4.7		8.7	6.55	3.16
1720	Cuitzeo	T. melanogaster				2	1	19.2	4.5		9.7	6.3	3.2
2154	Cuitzeo	T. melanogaster	30	6	2010	1	1	16.6	4.8	9.77		6.05	3.2
2176	Cuitzeo	T. melanogaster	30	6	2010	2	1	17.9	4.6	10.32		5.72	3.21
2166	Cuitzeo	T. melanogaster	30	6	2010	1	1	19	5.4	9.47	10.88	6.27	3.22
2167	Cuitzeo	T. melanogaster	30	6	2010	2	1	17.5	4.4	10.04	10.42	6.31	3.24
1922	Cuitzeo	T. melanogaster				1	1	18	5		11.05	5.8	3.27
2091	Cuitzeo	T. melanogaster	18	8	2009	2	1	18.5	5	11.4	10.41	6.72	3.27
2160	Cuitzeo	T. melanogaster	30	6	2010	2	1	18	4.2	9.46	9.86	5.93	3.29
1367	Cuitzeo	T. melanogaster	8	7	2005	1	1	17.5	5		10.51	5.24	3.3
1775	Cuitzeo	T. melanogaster	27	6	2008		1	21	5		9.9	4.5	3.3
1993	Cuitzeo	T. melanogaster	18	8	2009	2	1	18.5	5	10.9	11.5	9.39	3.3
1924	Cuitzeo	T. melanogaster				1	1	18.5	5		9.8	5.7	3.31
2148	Cuitzeo	T. melanogaster	30	6	2010	2	1	17.2	4.4	11.08	10.82	6.62	3.39
1560	Cuitzeo	T. melanogaster				2	1	27.4	5.4		10.4	5.69	3.4
1715	Cuitzeo	T. melanogaster	6	4	2008	2	1	19.5	4.5		10.33	6.05	3.4
1782	Cuitzeo	T. melanogaster	27	6	2008		1	20.5	4.2		10.58	4.7	3.4
2158	Cuitzeo	T. melanogaster	30	6	2010	2	1	17.5	4.9	9.49	10.17	6.13	3.4
1991	Cuitzeo	T. melanogaster	18	8	2009	1	1	18.1	5	10.47	10.28	6.82	3.46
2141	Cuitzeo	T. melanogaster	30	6	2010	2	1	18	4.4	10.95	9.8	5.82	3.48
1514	Cuitzeo	T. melanogaster	22	6	2006	2	1	17.5	4.5		10.9	4.76	3.5
1558	Cuitzeo	T. melanogaster				1	1	25.3	6.37		9.6	6.2	3.5
1719	Cuitzeo	T. melanogaster				2	1	19	4		9.8	4.4	3.5
1721	Cuitzeo	T. melanogaster				2	1	22.5	5.5		11.2	5.46	3.5
1723	Cuitzeo	T. melanogaster				2	1	21	5		9.35	6.1	3.5
2163	Cuitzeo	T. melanogaster	30	6	2010	1	1	17.6	4.4	9.4	10.31	5.42	3.52
2157	Cuitzeo	T. melanogaster	30	6	2010	1	1	18	5.2	8		6.4	3.59
1371	Cuitzeo	T. melanogaster	8	7	2005	1	1	18	5.5		11.45	5.52	3.6
1505	Cuitzeo	T. melanogaster	27	4	2006	2	2	34	10		8.41	8.62	3.6
1513	Cuitzeo	T. melanogaster	22	6	2006	1	1	17	4.5		10.21	4.34	3.6
1733	Cuitzeo	T. melanogaster					1	19.5	4.5		9.1	5.2	3.6
2088	Cuitzeo	T. melanogaster	18	8	2009	1	1	19.2	5.9	9.74	10.12	6.7	3.66
2147	Cuitzeo	T. melanogaster	30	6	2010	1	1	18.4	5.5	10.92		5.84	3.69
1369	Cuitzeo	T. melanogaster	8	7	2005	1	1	20	6.5		10.47	5.08	3.7
1556	Cuitzeo	T. melanogaster	28	9	2006	2	1	19.8	6.3		11.83	6.08	3.7
1737	Cuitzeo	T. melanogaster					1	19	4		10.41	6.7	3.7
1752	Cuitzeo	T. melanogaster	6	6	2008		1	20.5	4.5		10.2	5.6	3.7
2153	Cuitzeo	T. melanogaster	30	6	2010	2	1	18.6	4.7	9.99	10.8	6.52	3.72
1330	Cuitzeo	T. melanogaster	2	6	2005	2	1	18.1	5.6		10.07		3.73
2169	Cuitzeo	T. melanogaster	30	6	2010	1	1	18.8	5.2	9.76	9.54	6.23	3.73
2026	Cuitzeo	T. melanogaster	18	8	2009	2	1	17.5	4.9	11.24	11.39	5.98	3.76
1946	Cuitzeo	T. melanogaster	18	8	2009	1	1	17.5	5.5		11.87	6.65	3.765
2098	Cuitzeo	T. melanogaster	2	10	2009	2	1	19	5.1	11.27	11.2	6.85	3.78
1978	Cuitzeo	T. melanogaster	18	8	2009	2	1	18.4	5		11.06	6.68	3.79
1729	Cuitzeo	T. melanogaster				2	1	20.5	5.5		10.72	5.4	3.8
2143	Cuitzeo	T. melanogaster	30	6	2010	2	1	17.8	4.7	10.92	10.28	5.92	3.83
2023	Cuitzeo	T. melanogaster	18	8	2009	1	1	18.5	5.4	10.84	11.05	6.86	3.84
1522	Cuitzeo	T. melanogaster	22	6	2006	2	1	24	7		9.63	6.48	3.9
1731	Cuitzeo	T. melanogaster					1	20.7	4.7		11.1	5.1	3.9
1982	Cuitzeo	T. melanogaster	18	8	2009	2	1	18.7	4.3			6.43	3.9
2030	Cuitzeo	T. melanogaster	18	8	2009	1	1	19	5.6	9.64	12.21	6.12	3.9
2146	Cuitzeo	T. melanogaster	30	6	2010	1	1	18.2	5.1	10	11.61	6.48	3.9
2032	Cuitzeo	T. melanogaster	18	8	2009	1	1	18	5.5	10.92	11.77	6.38	3.91
2162	Cuitzeo	T. melanogaster	30	6	2010	2	1	18.5	5.2	8.99	11.77	6.21	3.95
1984	Cuitzeo	T. melanogaster	18	8	2009	2	1	18.5	5.2		11.47	6.87	3.97
1724	Cuitzeo	T. melanogaster				2	1	21.5	4.5		9.8	6.6	4
1749	Cuitzeo	T. melanogaster		6	2008		1	22	5.2		9.7	5.8	4
1779	Cuitzeo	T. melanogaster	27	6	2008		1	20	4.8		11.22	5.3	4
2064	Cuitzeo	T. melanogaster	18	8	2009	1	1	19.7	6	10.93	10.8	6.67	4.04
1931	Cuitzeo	T. melanogaster				2	1	20	5.1		12.3	6.12	4.05
1992	Cuitzeo	T. melanogaster	18	8	2009	1	1	19	6	10.46	10.13	6.01	4.06
1983	Cuitzeo	T. melanogaster	18	8	2009	1	1	19.5	5.9		10.7	6.52	4.07
1333	Cuitzeo	T. melanogaster	10	6	2005	2	1	18	6.2		10.4	5.6	4.1
1372	Cuitzeo	T. melanogaster	8	7	2005	2	1	20.5	6.3		11.19	5.65	4.1
1524	Cuitzeo	T. melanogaster	22	6	2006	1	1	19.7	7		14.97	5.87	4.1
1550	Cuitzeo	T. melanogaster	25	8	2006	2	1	20.5	6.4		9.76	5.95	4.1
1717	Cuitzeo	T. melanogaster	6	4	2008	2	1	22.5	5.5		11.04	5.5	4.1
1769	Cuitzeo	T. melanogaster	27	6	2008		1	20.8	4.8		10.58	5.1	4.1
1780	Cuitzeo	T. melanogaster	27	6	2008		1	23.5	6		10.8	5.1	4.1
1359	Cuitzeo	T. melanogaster	11	6	2005	1	1	19.5	6.3		10.23		4.13
1360	Cuitzeo	T. melanogaster	11	6	2005	1	1	20	6.1		9.98		4.15
1518	Cuitzeo	T. melanogaster	22	6	2006	2	1	24.5	7.5		9.99	6.16	4.2
1726	Cuitzeo	T. melanogaster				2	1	23	5.5		11.88	5.2	4.2
2097	Cuitzeo	T. melanogaster	2	10	2009	2	1	19	5.3	11.01	10.58	6.08	4.22
1998	Cuitzeo	T. melanogaster	18	8	2009	2	1	19	4.5	11.21	10.17	6.25	4.23
1977	Cuitzeo	T. melanogaster	18	8	2009	1	1	19.3	5.7		10.49	6.43	4.25
2197	Cuitzeo	T. melanogaster	17	8	2010	2	1	19.3	4.6	10.19	7	5.15	4.26
2047	Cuitzeo	T. melanogaster	18	8	2009	1	1	18.5	5.6	11.42	9.1	5.84	4.27
2074	Cuitzeo	T. melanogaster	18	8	2009	1	1	18.6	5.4	10.84	12	7.12	4.28
1586	Cuitzeo	T. melanogaster	11	12	2006	2	1	18	4.6		10.56	6.4	4.3
1772	Cuitzeo	T. melanogaster	27	6	2008		1	21	5.1		9.56	5.5	4.3
2152	Cuitzeo	T. melanogaster	30	6	2010	2	1	19.2	5.3	10.27	9.9	6.61	4.3
2068	Cuitzeo	T. melanogaster	18	8	2009	2	1	19.8	5.2	11.15	10.94	6.86	4.32
2159	Cuitzeo	T. melanogaster	30	6	2010	2	1	18.3	6	9.61	9.99	6.01	4.34
2063	Cuitzeo	T. melanogaster	18	8	2009	1	1	19.5	5.4	11.4	10.16	6.54	4.35
2156	Cuitzeo	T. melanogaster	30	6	2010	2	1	19.5	5.6	10.19	11.36	5.58	4.36
1935	Cuitzeo	T. melanogaster				2	1	20	4.6		9.2	5.58	4.37
1751	Cuitzeo	T. melanogaster	6	6	2008		1	20.5	4.8		11.16	5.3	4.4
1766	Cuitzeo	T. melanogaster	27	6	2008	2	1	21.5	5		10.45	5.1	4.4
1776	Cuitzeo	T. melanogaster	27	6	2008		1	22	4.5		9.58	5.2	4.4
1850	Cuitzeo	T. melanogaster	24	10	2008	2	1	19	4.5		9.51	6.53	4.4
2040	Cuitzeo	T. melanogaster	18	8	2009	1	1	21	6	10.27	10.46	6.6	4.41
1358	Cuitzeo	T. melanogaster	11	6	2005	1	1	19.1	6.2		6.98		4.42
2155	Cuitzeo	T. melanogaster	30	6	2010	2	1	19.1	4.9	10.67	11.4	7.5	4.44
1716	Cuitzeo	T. melanogaster	6	4	2008	2	1	21.5	5.5		10.65	6.82	4.5
1778	Cuitzeo	T. melanogaster	27	6	2008		1	21	5		11.71	6.2	4.5
2089	Cuitzeo	T. melanogaster	18	8	2009	1	1	21.3	6	11.6		7.41	4.5
2199	Cuitzeo	T. melanogaster	17	8	2010	1	1	19.5	4.7	9.17	10.53	5.28	4.51
2028	Cuitzeo	T. melanogaster	18	8	2009	1	1	19.6	5.8	11.03	12.21	6.1	4.53
2071	Cuitzeo	T. melanogaster	18	8	2009	2	1	19	5.1	10.4	10.71	6.9	4.55
1732	Cuitzeo	T. melanogaster					1	21.5	4.5		10.01	4.8	4.6
2021	Cuitzeo	T. melanogaster	18	8	2009	2	1	19	5.2	10.8	10.01	7.06	4.62
2087	Cuitzeo	T. melanogaster	18	8	2009	2	1	20.2	5.7	11.04	11.3	7.07	4.62
2170	Cuitzeo	T. melanogaster	30	6	2010	1	1	20	5.5	11.26	11.6	5.61	4.65
2175	Cuitzeo	T. melanogaster	30	6	2010	2	1	20.2	5.3	9.49	9.08	5.36	4.65
2151	Cuitzeo	T. melanogaster	30	6	2010	2	1	19.2	4.5	11.46	10.79	1.15	4.66
1525	Cuitzeo	T. melanogaster	22	6	2006	1	1	20	6.5		10.29	5.26	4.7
1528	Cuitzeo	T. melanogaster	22	6	2006	1	1	21	7		11.17	5.99	4.7
1988	Cuitzeo	T. melanogaster	18	8	2009	1	1	19.5	5.3		10.66	7.31	4.7
2027	Cuitzeo	T. melanogaster	18	8	2009	1	1	20	6.1	11.47	11.13	5.59	4.72
2171	Cuitzeo	T. melanogaster	30	6	2010	2	1	20.1	5.1	11.25	6.72	6.45	4.75
2073	Cuitzeo	T. melanogaster	18	8	2009	1	1	19.7	5.5	10.35	11.18	5.98	4.76
2035	Cuitzeo	T. melanogaster	18	8	2009	2	1	19.5	5.2	11.24	12.02	6.48	4.77
1357	Cuitzeo	T. melanogaster	11	6	2005	2	1	19.6	6.1		9.96		4.78
1365	Cuitzeo	T. melanogaster	8	7	2005	2	1	19	6.3		10.84	6.04	4.8
1368	Cuitzeo	T. melanogaster	8	7	2005	2	1	20	5.5		9.94	5.48	4.8
1527	Cuitzeo	T. melanogaster	22	6	2006	1	1	22	7		10.41	6.79	4.8
1529	Cuitzeo	T. melanogaster	22	6	2006	2	1	21.5	5		11.77	6.09	4.8
1714	Cuitzeo	T. melanogaster	6	4	2008	2	1	22	5		11.16	6.47	4.8
1767	Cuitzeo	T. melanogaster	27	6	2008		1	22	5		11.09	5.6	4.8
1771	Cuitzeo	T. melanogaster	27	6	2008		1	22	5.8		11.19	5.3	4.8
2070	Cuitzeo	T. melanogaster	18	8	2009	2	1	19.3	5.5	9.98	12.33	6.92	4.82
2037	Cuitzeo	T. melanogaster	18	8	2009	1	1	19.4	5.6	10.72	11.66	6.32	4.9
1980	Cuitzeo	T. melanogaster	18	8	2009	1	1	19.5	6		11.7	6.12	4.93
1526	Cuitzeo	T. melanogaster	22	6	2006	1	1	21	6		11.23	5.69	5
1973	Cuitzeo	T. melanogaster	18	8	2009	2	1	18.5	5.1		9.8	6.8	5
1952	Cuitzeo	T. melanogaster	18	8	2009	2	1	19	5.2		11.03	6.92	5.006
2054	Cuitzeo	T. melanogaster	18	8	2009	1	1	20.2	6.1	10.87	11.03	7.41	5.01
2026	Cuitzeo	T. melanogaster	18	8	2009	2	1	20	5.4	10.45	11.54	7.29	5.03
2039	Cuitzeo	T. melanogaster	18	8	2009	1	1	19.2	5.7	9.33	4.38	7.27	5.08
1979	Cuitzeo	T. melanogaster	18	8	2009	1	1	19.2	5.8		11.62	6.86	5.09
2078	Cuitzeo	T. melanogaster	18	8	2009	1	1	21	6.1	10.94	10.47	6.44	5.09
1976	Cuitzeo	T. melanogaster	18	8	2009	2	1	20.8	5.4		9.42	7.14	5.12
2149	Cuitzeo	T. melanogaster	30	6	2010	2	1	20.3	4.7	11.09	10.57	7.06	5.14
1956	Cuitzeo	T. melanogaster	18	8	2009	1	1	20	6.2		10.34	6.99	5.16
2173	Cuitzeo	T. melanogaster	30	6	2010	2	1	19.8	5.4	11.23	12.74	5.72	5.17
1725	Cuitzeo	T. melanogaster				2	1	24.5	5.7		10.8	6.5	5.2
2050	Cuitzeo	T. melanogaster	18	8	2009	1	1	20.7	5.9	11.48	11.02	6.31	5.2
1989	Cuitzeo	T. melanogaster	18	8	2009	2	1	18	5		10.33	5.53	5.28
2024	Cuitzeo	T. melanogaster	18	8	2009	1	1	20.4	5.5	10.87	8.8	7.18	5.29
2038	Cuitzeo	T. melanogaster	18	8	2009	1	1	22.4	6.5	11.21	10.74	6.99	5.29
2072	Cuitzeo	T. melanogaster	18	8	2009	2	1	19.8	4.9	10.51	11.12	7.44	5.29
1553	Cuitzeo	T. melanogaster	28	9	2006	2	1	20	6.7		11.26	6.28	5.3
1768	Cuitzeo	T. melanogaster	27	6	2008		1	22.8	4.5		10.85	4.8	5.3
2042	Cuitzeo	T. melanogaster	18	8	2009	2	1	20	6	10.76	10.96	7.21	5.33
2044	Cuitzeo	T. melanogaster	18	8	2009	1	1	21	6.5	10.01	9.7	7.21	5.35
1364	Cuitzeo	T. melanogaster	8	7	2005	2	1	20	6.5		11.05	5.4	5.4
2077	Cuitzeo	T. melanogaster	18	8	2009	1	1	21.5	6.1	10.99	10.16	6.84	5.4
2034	Cuitzeo	T. melanogaster	18	8	2009	2	1	20.5	5.4	9.55	10.9	6.58	5.45
1996	Cuitzeo	T. melanogaster	18	8	2009	1	1	21.4	6	11.43	10.44	6.07	5.46
1351	Cuitzeo	T. melanogaster	10	6	2005	2	1	19	5.6		10.11	10.76	5.5
1722	Cuitzeo	T. melanogaster				2	1	22.5	4.8		11.34	6.4	5.5
1739	Cuitzeo	T. melanogaster					1	22.5	4.8		10.78	6.2	5.5
1539	Cuitzeo	T. melanogaster	22	6	2006	2	1	21	6		10.6	5.76	5.6
2164	Cuitzeo	T. melanogaster	30	6	2010	1	1	18.7	5.5	11.07	10.26	5.7	5.67
1334	Cuitzeo	T. melanogaster	10	6	2005	2	1	20	5		12	5.6	5.7
2062	Cuitzeo	T. melanogaster	18	8	2009	1	1	21.3	6.5	9.89	9.84	7.48	5.74
1985	Cuitzeo	T. melanogaster	18	8	2009	2	1	20	5.1		6.5	7.62	5.76
2043	Cuitzeo	T. melanogaster	18	8	2009	1	1	20.55	5.7	10.74	11.8	6.4	5.77
1742	Cuitzeo	T. melanogaster					1	23	5.5		11.68	5.5	5.8
2046	Cuitzeo	T. melanogaster	18	8	2009	2	1	22	5.6	10.12	9.6	7.44	5.83
2066	Cuitzeo	T. melanogaster	18	8	2009	1	1	22	6.7	10.91	11.06	7.44	5.86
2075	Cuitzeo	T. melanogaster	18	8	2009	1	1	21	6.4	11.6	11.26	6.78	5.93
2086	Cuitzeo	T. melanogaster	18	8	2009	2	1	21	5.8	12.53	12.21	7.11	5.93
2198	Cuitzeo	T. melanogaster	17	8	2010	2	1	20.7	4.9	10.35	13.3	5.6	5.94
1538	Cuitzeo	T. melanogaster	22	6	2006	2	1	22	6.5		10.43	6.62	6
1536	Cuitzeo	T. melanogaster	22	6	2006	2	1	22	6		11.21	6.37	6.1
1547	Cuitzeo	T. melanogaster	25	8	2006	2	1	22.2	6.5		11.6	6.89	6.1
2076	Cuitzeo	T. melanogaster	18	8	2009	2	1	21.2	5.8	11.98	12.17	7.5	6.13
1981	Cuitzeo	T. melanogaster	18	8	2009	2	1	21.5	5.9		10.83	6.98	6.18
1370	Cuitzeo	T. melanogaster	8	7	2005	2	1	21	7.5		11.23	5.58	6.2
1534	Cuitzeo	T. melanogaster	22	6	2006	2	1	21.5	6		12.23	5.25	6.2
1954	Cuitzeo	T. melanogaster	18	8	2009	1	1	21.7	6.4		10.45	9.99	6.223
1945	Cuitzeo	T. melanogaster	18	8	2009	2	1	20.5	6.2		11.3	6.02	6.266
1530	Cuitzeo	T. melanogaster	22	6	2006	2	1	22.5	6.2		11.5	5.9	6.3
1535	Cuitzeo	T. melanogaster	22	6	2006	2	1	22	6.5		11.29	5.67	6.3
1746	Cuitzeo	T. melanogaster					1	23.2	4.8		11.89	6.07	6.3
2069	Cuitzeo	T. melanogaster	18	8	2009	1	1	20.5	6.4	11.01	11.7	6.48	6.31
1355	Cuitzeo	T. melanogaster	11	6	2005	2	1	19.5	6		12.21		6.36
1949	Cuitzeo	T. melanogaster	18	8	2009	1	1	19	5.7		10.6	7.73	6.388
2053	Cuitzeo	T. melanogaster	18	8	2009	1	1	21.5	6	11.53	10	7.53	6.39
1350	Cuitzeo	T. melanogaster	10	6	2005	1	1	21.5	6.5		10.2	6.58	6.4
1557	Cuitzeo	T. melanogaster	28	9	2006	2	1	21.9	6.6		11.4	6.43	6.4
2036	Cuitzeo	T. melanogaster	18	8	2009	1	1	22	6.7	12.06	10.36	7.68	6.4
2041	Cuitzeo	T. melanogaster	18	8	2009	2	1	23	6.3	10.77	12.38	7.34	6.45
1532	Cuitzeo	T. melanogaster	22	6	2006	2	1	23	6.5		12.08	5.74	6.5
2081	Cuitzeo	T. melanogaster	18	8	2009	2	1	27.1	6.4	11.53	11.59	6.23	6.5
2058	Cuitzeo	T. melanogaster	18	8	2009	2	1	25.9	6.3	12.33	12.5	7.91	6.51
2067	Cuitzeo	T. melanogaster	18	8	2009	2	1	21.3	5.9	11.94	12.51	6.73	6.55
1835	Cuitzeo	T. melanogaster	24	10	2008	2	1	21	4		11.52	6.32	6.58
1750	Cuitzeo	T. melanogaster	6	6	2008		1	24.5	7.2		11.94	6.05	6.6
1953	Cuitzeo	T. melanogaster	18	8	2009	2	1	20	5.9		11.75	7.65	6.6
1947	Cuitzeo	T. melanogaster	18	8	2009	2	1	21.4	5.6		12.35	7.88	6.64
2049	Cuitzeo	T. melanogaster	18	8	2009	1	1	21.7	6.7	11.69	11.2	7.22	6.66
1549	Cuitzeo	T. melanogaster	25	8	2006	2	1	25.5	7		12.2	6.9	6.7
1565	Cuitzeo	T. melanogaster				2	1	30	7.2		11.7	6.47	6.8
1774	Cuitzeo	T. melanogaster	27	6	2008		1	24.5	6.2		9.56	5.1	6.8
2042	Cuitzeo	T. melanogaster	18	8	2009	1	1	22.5	6.1	12.14	9.75	6.75	6.82
2059	Cuitzeo	T. melanogaster	18	8	2009	1	1	21.7	6	11.15	12.4	6.72	6.83
2127	Cuitzeo	T. melanogaster	25	3	2010	1	1	22.2	7.3	11.09	10.6	6.92	6.83
2085	Cuitzeo	T. melanogaster	18	8	2009	2	1	23	5.8	11.87	10.2	7.31	6.99
2056	Cuitzeo	T. melanogaster	18	8	2009	2	1	22.1	6	11.9	11.76	7.15	7.03
1263 (2)	Cuitzeo	T. melanogaster	6	5	2005	2	1	23.5	5		13.07	5.73	7.1
1583	Cuitzeo	T. melanogaster	11	12	2006	1	1	21.5	6		13.36	6.5	7.1
2022	Cuitzeo	T. melanogaster	18	8	2009	2	1	21	5.7	10.88	12.41	6.92	7.15
1521	Cuitzeo	T. melanogaster	22	6	2006	1	1	20	6.5		11.54	5.08	7.3
1580	Cuitzeo	T. melanogaster	11	12	2006	1	1	22	6.7		12.72	10.2	7.3
1585	Cuitzeo	T. melanogaster	11	12	2006	2	1	23	5		7.56	5.9	7.3
1264 (2)	Cuitzeo	T. melanogaster	6	5	2005	1	1	24.5	7.5		11.94	6.04	7.4
1570	Cuitzeo	T. melanogaster				2	1	28.1	6.8		12.41	7.08	7.4
1773	Cuitzeo	T. melanogaster	27	6	2008		1	32	7.2		10.76	5.6	7.4
1986	Cuitzeo	T. melanogaster	18	8	2009	1	1	24	6.5		6.7	7.13	7.43
2079	Cuitzeo	T. melanogaster	18	8	2009	2	1	23.8	6.3	11.56	13.62	7.15	7.45
1571	Cuitzeo	T. melanogaster				2	1	24	6.7		11.42	6.28	7.5
2065	Cuitzeo	T. melanogaster	18	8	2009	2	1	22	6	11.81	13.81	7.16	7.51
2080	Cuitzeo	T. melanogaster	18	8	2009	2	1	22.1	6	12.06	13.43	6.89	7.58
2090	Cuitzeo	T. melanogaster	18	8	2009	2	1	24.3	6.1	12.15	11.3	7.32	7.7
2202	Cuitzeo	T. melanogaster	17	8	2010	2	1	22	6.1	11.16	12.05	6.5	7.74
2033	Cuitzeo	T. melanogaster	18	8	2009	1	1	22	6.7	10.85	6.6	7.7	7.76
1584	Cuitzeo	T. melanogaster	11	12	2006	2	1	22	1		11.03	7.5	7.8
1938	Cuitzeo	T. melanogaster				2	1	14.5	6		10.67	7.07	7.86
2082	Cuitzeo	T. melanogaster	18	8	2009	2	1	23	5.9	12.23	11.08	7.31	7.86
2045	Cuitzeo	T. melanogaster	18	8	2009	2	1	24.5	6.4	11	10.76	7.58	7.87
2055	Cuitzeo	T. melanogaster	18	8	2009	2	1	24	6.6	11.42	11.06	7.32	7.95
1582	Cuitzeo	T. melanogaster	11	12	2006	2	1	22.5	5.6		11.01	5.8	8
1975	Cuitzeo	T. melanogaster	18	8	2009	2	1	23.5	6		10.5	6.7	8.14
1523	Cuitzeo	T. melanogaster	22	6	2006	2	1	21.5	6.7		11.41	7.03	8.2
1831	Cuitzeo	T. melanogaster	24	10	2008	2	1	24	6		11.32	6.7	8.23
1373	Cuitzeo	T. melanogaster	8	7	2005	2	1	24	7		12.57	5.83	8.3
1517	Cuitzeo	T. melanogaster	22	6	2006	2	1	20	5.5		12.3	5.54	8.3
1967	Cuitzeo	T. melanogaster	18	8	2009	2	1	26.2	7.5		10.44	6.8	8.33
2061	Cuitzeo	T. melanogaster	18	8	2009	2	1	23.6	5.7	11.66	11.9	7.22	8.33
1537	Cuitzeo	T. melanogaster	22	6	2006	1	1	25.5	8		11.69	7.16	8.4
2174	Cuitzeo	T. melanogaster	30	6	2010	2	1	24.7	6.6	12.54	9.31	6.51	8.44
1951	Cuitzeo	T. melanogaster	18	8	2009	2	1	23	6		10.19	8.04	8.493
1363	Cuitzeo	T. melanogaster	8	7	2005	1	1	23	6		11.91	6.57	8.5
1734	Cuitzeo	T. melanogaster					1	32.5	7.3		11.37	6	8.6
1974	Cuitzeo	T. melanogaster	18	8	2009	2	1	22	6.5		14.43	7.26	8.64
1260 (2)	Cuitzeo	T. melanogaster	6	5	2005	2	1	23.5	8		15.32	6.6	8.7
1738	Cuitzeo	T. melanogaster					1	28	6.2		13.34	6.8	8.7
1338	Cuitzeo	T. melanogaster	10	6	2005	1	1	24	7		11.11	7.23	8.8
1875	Cuitzeo	T. melanogaster	16	1	2009	1	1	25	7.5		9.53	7	8.8
2213	Cuitzeo	T. melanogaster	16	3	2011		1	24.8	6.7	10.16	11.97	7.07	8.8
1235 (2)	Cuitzeo	T. melanogaster	6	5	2005	2	1	27	7		11.61	6	9
1511	Cuitzeo	T. melanogaster	27	4	2006	1	1	24.5	12		11.51	7.48	9
1554	Cuitzeo	T. melanogaster	28	9	2006	2	1	22	8.4		12.11	5.98	9
1561	Cuitzeo	T. melanogaster				2	2	33.2	3.8		12.79	6.72	9
1519	Cuitzeo	T. melanogaster	22	6	2006	1	1	17	5		10.71	5.34	9.1
1948	Cuitzeo	T. melanogaster	18	8	2009	2	1	23.6	6.7		10.4	7.55	9.146
1516	Cuitzeo	T. melanogaster	22	6	2006	2	1	23	6.5		15.78	6.25	9.2
1897	Cuitzeo	T. melanogaster	2	4	2009	1	1	28	7.4		14.86	7.55	9.3
1828	Cuitzeo	T. melanogaster	24	10	2008	2	1	24	5.5		11.12	7.8	9.4
2057	Cuitzeo	T. melanogaster	18	8	2009	1	1	24.2	7.4	10.86	10.01	6.5	9.43
2051	Cuitzeo	T. melanogaster	18	8	2009	2	1	24.5	5.8	12.41	11.2	8.4	9.46
1892	Cuitzeo	T. melanogaster	2	4	2009	1	1	29	7		11.1	9.49	9.5
1531	Cuitzeo	T. melanogaster	22	6	2006	2	1	24.5	6		10.52	6.84	9.6
1830	Cuitzeo	T. melanogaster	24	10	2008	2	1	25	6		11.65	6.8	9.6
1846	Cuitzeo	T. melanogaster	24	10	2008	2	1	26	6		12.14	6.7	9.6
1581	Cuitzeo	T. melanogaster	11	12	2006	1	1	23.5	6.5		11.32	10.7	9.7
1918	Cuitzeo	T. melanogaster	28	5	2009	2	1	26	7		11.77	6.8	9.72
1250 (2)	Cuitzeo	T. melanogaster	6	5	2005	1	1	25.5	7.1		12.26	7.52	9.8
1569	Cuitzeo	T. melanogaster				1	1	31.7	8.7		12.13	6.65	9.8
2179	Cuitzeo	T. melanogaster	30	6	2010	1	1	27	7.6	12.38	11.99	7.76	9.83
1555	Cuitzeo	T. melanogaster	28	9	2006	1	1	25.6	7.3		15.58	6.23	9.9
1563	Cuitzeo	T. melanogaster				2	2	33.7	8.1		15.37	6.65	9.9
1573	Cuitzeo	T. melanogaster				2	1	27.5	7.7		13.96	5.96	9.9
1876	Cuitzeo	T. melanogaster	16	1	2009	2	1	26.5	8.1		11.39	5.66	9.9
2060	Cuitzeo	T. melanogaster	18	8	2009	1	1	24.5	7.3	16.44	11.5	7.01	9.9
2048	Cuitzeo	T. melanogaster	18	8	2009	2	1	24	6.4	12.1	16.67	7.25	9.92
1802	Cuitzeo	T. melanogaster	4	9	2008	2	1	21.6	6.1		12.34	6.23	9.96
1566	Cuitzeo	T. melanogaster				2	1	26.5	8.5		12.53	5.69	10.1
1910	Cuitzeo	T. melanogaster	2	4	2009	2	1	25	6.5		11.86	8.7	10.1
1567	Cuitzeo	T. melanogaster				2	2	34	8.4		6.7	7.53	10.2
1966	Cuitzeo	T. melanogaster	18	8	2009	1	1	24	7.3		11.73	7.27	10.2
1709	Cuitzeo	T. melanogaster	14	4	2008	1	1	25	6		12.48	7.57	10.4
1540	Cuitzeo	T. melanogaster	22	6	2006	2	1	27	6		12.88	6.93	10.5
1568	Cuitzeo	T. melanogaster				2	1	31	7.3		11.94	7.13	10.5
2142	Cuitzeo	T. melanogaster	30	6	2010	2	1	26.5	6.8	12.31	14.06	8.07	10.69
1579	Cuitzeo	T. melanogaster	11	12	2006	1	1	21.5	6		9.94	11.8	10.7
1612	Cuitzeo	T. melanogaster	1	2	2007	2	1	24.5	8.5		10.73	7.01	10.7
1859	Cuitzeo	T. melanogaster	16	1	2009	1	1	28	7.5		14.48	5.54	10.73
1246 (2)	Cuitzeo	T. melanogaster	6	5	2005	2	1	28	6		12.15	6.96	10.8
1251 (2)	Cuitzeo	T. melanogaster	6	5	2005	1	1	29.5	7.7		12.64	7.19	10.9
1247 (2)	Cuitzeo	T. melanogaster	6	5	2005	1	1	24.7	7.1		10.14	8.25	11.1
1572	Cuitzeo	T. melanogaster				2	1	26	7.9		15.82	6.98	11.1
1575	Cuitzeo	T. melanogaster	11	12	2006	1	1	24.5	5.6		12.91	7.92	11.1
1888	Cuitzeo	T. melanogaster	2	4	2009	2	1	27	6.6		21.6	9.6	11.13
1800	Cuitzeo	T. melanogaster	4	9	2008	2	1	25	6		12.92	7.9	11.15
1256 (2)	Cuitzeo	T. melanogaster	6	5	2005	2	1	26	7.2		10.9	7.5	11.2
2177	Cuitzeo	T. melanogaster	30	6	2010	1	1	27	7	11.63	12.2	7.2	11.22
1836	Cuitzeo	T. melanogaster	24	10	2008	1	1	27.5	6		11.68	6.21	11.35
1574	Cuitzeo	T. melanogaster	11	12	2006	1	1	27	6.5		15.69	7.86	11.4
1880	Cuitzeo	T. melanogaster	16	1	2009	1	1	27	3.3		13.4	7.18	11.4
2145	Cuitzeo	T. melanogaster	30	6	2010	2	1	26.8	6.9	11.6	13.87	6.29	11.67
1969	Cuitzeo	T. melanogaster	18	8	2009	2	1	26	6.5		12.65	7.82	11.7
1957	Cuitzeo	T. melanogaster	18	8	2009	1	1	29.5	6.7		14.39	8.26	11.88
1261 (2)	Cuitzeo	T. melanogaster	6	5	2005	2	1	27.5	7		13.5	7.2	11.9
1564	Cuitzeo	T. melanogaster				2	1	32.7	7.7		15.44	6.98	12
1843	Cuitzeo	T. melanogaster	24	10	2008	2	1	26	6		12.5	7.16	12
1833	Cuitzeo	T. melanogaster	24	10	2008	1	1	28	9		13.29	6.6	12.02
1576	Cuitzeo	T. melanogaster	11	12	2006	2	1	24.5	6.5		12.71	6.8	12.3
1965	Cuitzeo	T. melanogaster	18	8	2009	2	1	26.4	7		11.59	8.03	12.32
1255 (2)	Cuitzeo	T. melanogaster	6	5	2005	2	1	27	7.3		15.29	7.23	12.4
1236 (2)	Cuitzeo	T. melanogaster	6	5	2005	2	1	28	10.5		13.47	7.38	12.5
1239 (2)	Cuitzeo	T. melanogaster	6	5	2005	2	1	29	7.1		13.3	6.72	12.5
1262 (2)	Cuitzeo	T. melanogaster	6	5	2005	2	1	26.5	7.3		15.52	6.71	12.5
1801	Cuitzeo	T. melanogaster	4	9	2008	2	1	25	6		12.16	6.8	12.5
1968	Cuitzeo	T. melanogaster	18	8	2009	1	1	30.4	9.5		12.74	8.3	12.75
1884	Cuitzeo	T. melanogaster	16	1	2009	2	1	26.8	7.5		11.2		12.8
1578	Cuitzeo	T. melanogaster	11	12	2006	1	1	26.5	6.6		12.32	7.4	12.9
1827	Cuitzeo	T. melanogaster	24	10	2008	1	1	25	7		14.46	7.03	13
1883	Cuitzeo	T. melanogaster	16	1	2009	2	1	27.8	7.4		12.01		13
1917	Cuitzeo	T. melanogaster	28	5	2009	1	1	29	7		12.99	6.7	13.01
1882	Cuitzeo	T. melanogaster	16	1	2009	2	1	26.5	6.2		11.32	8.12	13.09
1253 (2)	Cuitzeo	T. melanogaster	6	5	2005	2	1	28.2	7.3		11.6	7.39	13.1
2219	Cuitzeo	T. melanogaster	16	3	2011	2	1	29.2	8.2	11.7	9.29	7.99	13.2
2172	Cuitzeo	T. melanogaster	30	6	2010	1	1	29.3	9.1	12.6	12.84	6.76	13.27
1960	Cuitzeo	T. melanogaster	18	8	2009	1	1	32.8	10.5		14.28	8.74	13.35
2137	Cuitzeo	T. melanogaster	20	5	2010	2	1	28	7	12.06	14.96	8.24	13.49
1340	Cuitzeo	T. melanogaster	10	6	2005	2	1	27.5	4.5		11.45	6.73	13.5
1903	Cuitzeo	T. melanogaster	2	4	2009	2	1	31	8.3		11.01	7.89	13.6
2222	Cuitzeo	T. melanogaster	16	3	2011	2	1	28.2	6.2	11.57	13.15	8.94	13.7
1608	Cuitzeo	T. melanogaster	1	2	2007	2	1	27.5	8.5		12.8	8.2	13.9
1706	Cuitzeo	T. melanogaster	14	4	2008	1	1	29	9		14.17	7.63	13.9
1841	Cuitzeo	T. melanogaster	24	10	2008	1	1	27	7		12.44	6.53	13.95
2182	Cuitzeo	T. melanogaster	30	6	2010	2	1	30	8.2	12.49	12.53	7.23	14.17
1337	Cuitzeo	T. melanogaster	10	6	2005	1	2	35	11.1		12.65	8	14.2
2224	Cuitzeo	T. melanogaster	16	3	2011	2	1	26.2	8.1	11.47	13.95	7.93	14.4
1254 (2)	Cuitzeo	T. melanogaster	6	5	2005	1	1	27.2	7.5		17.34	8.52	14.5
1607	Cuitzeo	T. melanogaster	1	2	2007	2	1	25	8.6		13.53	6.6	14.6
1847	Cuitzeo	T. melanogaster	24	10	2008	1	2	60	14		11.83	13.33	14.6
1963	Cuitzeo	T. melanogaster	18	8	2009	2	1	30.3	8.3		12.61	8.77	14.68
1339	Cuitzeo	T. melanogaster	10	6	2005	1	1	29.2	8.5		13.8	6.7	14.7
1797	Cuitzeo	T. melanogaster	4	9	2008	2	1	27	6.5		13.95	7.9	14.7
1799	Cuitzeo	T. melanogaster	4	9	2008	2	1	27	7		12.2	7.7	14.73
1842	Cuitzeo	T. melanogaster	24	10	2008	1	1	29	8		13.59	7.9	14.78
1614	Cuitzeo	T. melanogaster	1	2	2007	2	1	26	9.5		7.2	8.18	15
1502	Cuitzeo	T. melanogaster	27	4	2006	2	1	31	8		13.8	6.55	15.3
1533	Cuitzeo	T. melanogaster	22	6	2006	2	1	30	4		9.79	6.52	15.3
1874	Cuitzeo	T. melanogaster	16	1	2009	2	1	28.5	6		12.3	6.9	15.3
1613	Cuitzeo	T. melanogaster	1	2	2007	2	1	29.5	8.9		16.01	8.69	15.4
1964	Cuitzeo	T. melanogaster	18	8	2009	1	2	34.43	9.4		13.46	8.83	15.5
1707	Cuitzeo	T. melanogaster	14	4	2008	2	1	28	7		13.14	7.83	15.6
1248 (2)	Cuitzeo	T. melanogaster	6	5	2005	1	2	34	9.5		16	8.05	15.7
1577	Cuitzeo	T. melanogaster	11	12	2006	2	1	27.5	7		12.9	7.7	15.7
1243 (2)	Cuitzeo	T. melanogaster	6	5	2005	2	2	33	9.7		13.85	7.71	15.9
1869	Cuitzeo	T. melanogaster	16	1	2009	2	1	31	8.5		12	6.8	15.9
2181	Cuitzeo	T. melanogaster	30	6	2010	2	1	31.5	8.8	13.31	13.99	8.08	15.96
1699	Cuitzeo	T. melanogaster	14	4	2008	1	1	31	10		14.18	8.07	16
1889	Cuitzeo	T. melanogaster	2	4	2009	1	1	31	8.3		13.21	8.21	16
1504	Cuitzeo	T. melanogaster	27	4	2006	1	1	32	8		13.52	7.76	16.1
1611	Cuitzeo	T. melanogaster	1	2	2007	2	2	34.6	12.5		13.18	7.62	16.2
1848	Cuitzeo	T. melanogaster	24	10	2008	2	1	30	8.5		13.8	8.02	16.3
1824	Cuitzeo	T. melanogaster	24	10	2008	2	1	30	7.5		13.3	7.5	16.4
1878	Cuitzeo	T. melanogaster	16	1	2009	2	2	35.5	9.5		12.3	11.28	16.5
1917(2)	Cuitzeo	T. melanogaster				2	1	30.5	6		15.86	7.2	16.6
1913	Cuitzeo	T. melanogaster	28	5	2009	2	1	32.5	9		13.45	8.06	16.74
1242 (2)	Cuitzeo	T. melanogaster	6	5	2005	1	1	30	5.7		15.9	7.4	17
1881	Cuitzeo	T. melanogaster	16	1	2009	2	1	30	7.8		13.98	7.62	17.1
1703	Cuitzeo	T. melanogaster	14	4	2008	1	1	31	10		12.7	7.09	17.2
1839	Cuitzeo	T. melanogaster	24	10	2008	1	1	28	7		10.84	7.2	17.2
1894	Cuitzeo	T. melanogaster	2	4	2009	2	1	30	9.5		11.13	10.06	17.2
2215	Cuitzeo	T. melanogaster	16	3	2011	1	1	27.5	7.1	12.19	12.6	6.81	17.3
2183	Cuitzeo	T. melanogaster	30	6	2010	2	2	33.5	8.5	12.44	11	7.97	17.65
1238 (2)	Cuitzeo	T. melanogaster	6	5	2005	1	1	32	6		5.55	6.74	17.8
1509	Cuitzeo	T. melanogaster	27	4	2006	2	1	30.5	10.2		13.78	7.06	18
1510	Cuitzeo	T. melanogaster	27	4	2006	2	1	23.5	6.5		12.85	6.52	18
1621	Cuitzeo	T. melanogaster				2	2	33	9		15.05	7.6	18
1959	Cuitzeo	T. melanogaster	18	8	2009	1	2	34	10.9		15.54	7.95	18.03
1877	Cuitzeo	T. melanogaster	16	1	2009	1	2	39	12		14.77	9.27	18.2
1844	Cuitzeo	T. melanogaster	24	10	2008	1	2	33	7.5		13.8	7.29	18.48
1861	Cuitzeo	T. melanogaster	16	1	2009	1	1	31	8		13.08	7.4	18.5
1907	Cuitzeo	T. melanogaster	2	4	2009	2	2	33.5	8.5		12.45	7.67	18.6
1241 (2)	Cuitzeo	T. melanogaster	6	5	2005	2	1	30.5	7.6		4.3	7.24	18.8
1908	Cuitzeo	T. melanogaster	2	4	2009	2	2	35.5	8.8		15	7.37	18.9
2178	Cuitzeo	T. melanogaster	30	6	2010	1	2	33	9.7	13.33	12.59	7.98	18.93
1259 (2)	Cuitzeo	T. melanogaster	6	5	2005	2	1	28.5	8.5		12.69	5.8	19
1823	Cuitzeo	T. melanogaster	24	10	2008	1	1	32	8.5		14.04	6.5	19.02
1962	Cuitzeo	T. melanogaster	18	8	2009	1	2	35	9.5		12.54	9.09	19.08
1825	Cuitzeo	T. melanogaster	24	10	2008	1	2	33	9		12	6.4	19.09
1341	Cuitzeo	T. melanogaster	10	6	2005	2	2	33	8.6		13.24	8	19.1
1899	Cuitzeo	T. melanogaster	2	4	2009	2	2	35	9.2		13.25	11.61	19.2
2212	Cuitzeo	T. melanogaster	16	3	2011	2	2	37	10.8	14.27	11.91	7.33	19.4
1866	Cuitzeo	T. melanogaster	16	1	2009	1	2	33	8		13.06	7.5	19.5
1610	Cuitzeo	T. melanogaster	1	2	2007	2	1	31	7.4		14.74	8.45	19.7
1348	Cuitzeo	T. melanogaster	10	6	2005	2	1	32	8.5		14.87	7.76	19.9
1349	Cuitzeo	T. melanogaster	10	6	2005	1	1	31.4	9.2		16.5	7.84	19.9
1618	Cuitzeo	T. melanogaster	22	3	2007	2	2	33.5	9.5		13.4	7.9	20
1893	Cuitzeo	T. melanogaster	2	4	2009	2	2	35	9.3		13.73	11.49	20
1930	Cuitzeo	T. melanogaster				1	2	34	10.6		9.68	7.98	20.05
1712	Cuitzeo	T. melanogaster	16	4	2008	1	2	34	7		11.99	7.01	20.1
1909	Cuitzeo	T. melanogaster	2	4	2009	1	2	33	9.4		13.98	8	20.1
1705	Cuitzeo	T. melanogaster	14	4	2008	1	1	32	8.5		13.33	8	20.5
1704	Cuitzeo	T. melanogaster	14	4	2008	2	1	32	8		15.26	8.14	20.6
1594	Cuitzeo	T. melanogaster		7	2006	1	2	34.5	10.5		14.65	9.3	20.7
1898	Cuitzeo	T. melanogaster	2	4	2009	1	2	34	20		11.92	8.07	20.7
1939	Cuitzeo	T. melanogaster				1	2	39	11		12.71	6.5	20.7
1761	Cuitzeo	T. melanogaster	27	6	2008	2	2	43	10.4		20	6.16	20.8
1868	Cuitzeo	T. melanogaster	16	1	2009	1	1	32.5	9		16.48	7.08	20.8
1609	Cuitzeo	T. melanogaster	1	2	2007	2	1	31	11		14.7	8.72	20.9
2138	Cuitzeo	T. melanogaster	20	5	2010	1	2	35	9.6	11.78	14.07	8.67	20.95
1587	Cuitzeo	T. melanogaster	11	12	2006	2	2	36	9.5		14.23	8.12	21
1838	Cuitzeo	T. melanogaster	24	10	2008	1	2	35.5	8.5		13.35	7.8	21.1
2180	Cuitzeo	T. melanogaster	30	6	2010	1	1	32	9	12.27	13.21	8.3	21.1
1596	Cuitzeo	T. melanogaster		7	2006	2	2	34.5	10		13.99	9.8	21.2
1961	Cuitzeo	T. melanogaster	18	8	2009	1	2	36.5	11.3		13.9	9.12	21.21
1865	Cuitzeo	T. melanogaster	16	1	2009	2	2	33	8		15.14	8	21.3
1701	Cuitzeo	T. melanogaster	14	4	2008	2	2	34	9		14.61	8.13	21.4
1916	Cuitzeo	T. melanogaster	28	5	2009	1	2	36	11		13.98	6.9	21.4
2216	Cuitzeo	T. melanogaster	16	3	2011	2	1	32.4	8.3	15.19	13.14	7.8	21.4
1512	Cuitzeo	T. melanogaster	22	6	2006	2	1	17	5		12.8	5.15	21.6
1863	Cuitzeo	T. melanogaster	16	1	2009	2	1	32	8		14.44	7	21.7
1252 (2)	Cuitzeo	T. melanogaster	6	5	2005	1	1	32	9.4		13.6	7.86	22
1849	Cuitzeo	T. melanogaster	24	10	2008	1	2	41	10		14.17	9.09	22.05
2136	Cuitzeo	T. melanogaster	20	5	2010	1	2	36		7.37	13.1	1.55	22.08
1240 (2)	Cuitzeo	T. melanogaster	6	5	2005	2	2	35	10		14.52	8.04	22.1
1606	Cuitzeo	T. melanogaster	1	2	2007	2	2	34.5	11		15.23	7.17	22.1
1347	Cuitzeo	T. melanogaster	10	6	2005	1	2	37	11.6		13.3	7.74	22.3
2220	Cuitzeo	T. melanogaster	16	3	2011	2	2	39.7	10.5	14.91	16.88	8.55	22.6
1937	Cuitzeo	T. melanogaster				1	2	40	10		14.81	7.9	22.7
1497	Cuitzeo	T. melanogaster	27	4	2006	2	2	37	11			8.29	22.9
2223	Cuitzeo	T. melanogaster	16	3	2011	1	2	33.1	8.2	14.65	15.11	9.5	22.9
1929	Cuitzeo	T. melanogaster				2	2	38	9.5		11.76	7.8	23.14
1832	Cuitzeo	T. melanogaster	24	10	2008	2	1	32	9			7.9	23.3
1757	Cuitzeo	T. melanogaster	27	6	2008	2	2	40.5	9.5		13.88	7.23	23.6
1498	Cuitzeo	T. melanogaster	27	4	2006	1	2	33	10.5		15	7.34	23.9
1501	Cuitzeo	T. melanogaster	27	4	2006	2	2	35	9.5		14.41	7.6	24
2185	Cuitzeo	T. melanogaster	30	6	2010	2	2	36.5	10	15.27	15.1	8.51	24.62
1507	Cuitzeo	T. melanogaster	27	4	2006	2	2	35	7.5		15.5	6.83	24.7
1912	Cuitzeo	T. melanogaster	28	5	2009	2	2	41.5	11		16.81	7.9	24.9
1588	Cuitzeo	T. melanogaster	11	12	2006	1	2	36	9		14.69	9.2	25
1343	Cuitzeo	T. melanogaster	10	6	2005	2	2	35	8.6		15.53	9.17	25.1
2221	Cuitzeo	T. melanogaster	16	3	2011	2	1	30	8.7	13.23	15.59	7.08	25.1
1546	Cuitzeo	T. melanogaster	22	6	2006	2	2	38	10		17.79	7.7	25.3
1860	Cuitzeo	T. melanogaster	16	1	2009	1	1	30	10		15	7.8	25.5
1237 (2)	Cuitzeo	T. melanogaster	6	5	2005	1	2	35	10.5		16.09	8.79	25.7
2130	Cuitzeo	T. melanogaster	25	3	2010	1	2	35	19	14.37	13.8	7.79	25.75
1901	Cuitzeo	T. melanogaster	2	4	2009	2	1	32.5	8		15.53	8.73	25.8
2011	Cuitzeo	T. melanogaster	18	8	2009	1	2	40	9.5	16.1	13.2	9.41	25.86
1344	Cuitzeo	T. melanogaster	10	6	2005	1	2	34.5	13		17.09	7.78	26.5
1620	Cuitzeo	T. melanogaster				1	2	48	15		15.19	11	26.7
2187	Cuitzeo	T. melanogaster	30	6	2010	2	2	35	10.5	13.37	17.42	8.95	27.11
2190	Cuitzeo	T. melanogaster	30	6	2010	2	2	36	9.5	15.03	17.64	9.23	27.16
1745	Cuitzeo	T. melanogaster					2	38.2	6.5		14.37	6.9	27.5
2226	Cuitzeo	T. melanogaster	16	3	2011	1	2	36.6	10	14.95	16.2	7.99	27.53
1834	Cuitzeo	T. melanogaster	24	10	2008	1	2	38	11		14.94	8.5	27.65
1760	Cuitzeo	T. melanogaster	27	6	2008	2	2	43.5	10.2		15.18	6.5	27.9
1864	Cuitzeo	T. melanogaster	16	1	2009	1	2	34	8.5		17.31	7.2	28
2184	Cuitzeo	T. melanogaster	30	6	2010	2	2	40	10.5	13.91	15.8	9.3	28.2
1914	Cuitzeo	T. melanogaster	28	5	2009	1	2	41	13		12.01	7.7	28.6
2186	Cuitzeo	T. melanogaster	30	6	2010	2	2	38	11.5	13.41	14.02	9.81	28.7
1711	Cuitzeo	T. melanogaster	16	4	2008	1	2	34	9		14.2	8.52	28.8
1867	Cuitzeo	T. melanogaster	16	1	2009	1	2	37	11		12.1	7.01	28.8
1958	Cuitzeo	T. melanogaster	18	8	2009	2	2	36.1	10.1		17.08	10.93	29.02
1744	Cuitzeo	T. melanogaster					2	41.5	9			5.6	29.1
1845	Cuitzeo	T. melanogaster	24	10	2008	2	2	39	10		15.7	9.2	29.44
1702	Cuitzeo	T. melanogaster	14	4	2008	2	2	36.5	9		17.88	8.39	29.5
1972	Cuitzeo	T. melanogaster	18	8	2009	2	2	47	13.1		17	11.75	29.59
1543	Cuitzeo	T. melanogaster	22	6	2006	1	2	40	14		18.91	8.03	30
1918(3)	Cuitzeo	T. melanogaster				2	1	30.5			14.9	13.8	30.08
1508	Cuitzeo	T. melanogaster	27	4	2006	1	2	37	12		13.96	8.67	30.1
2004	Cuitzeo	T. melanogaster	18	8	2009	1	2	38.5	10.8	15.79	13.95	8.69	30.28
2001	Cuitzeo	T. melanogaster	18	8	2009	1	2	40	13	17.09	11.53	10.28	30.32
1708	Cuitzeo	T. melanogaster	14	4	2008	1	2	36	12		14.31	7.32	30.4
1915	Cuitzeo	T. melanogaster	28	5	2009	2	2	37	11		16.72	8.4	30.5
1545	Cuitzeo	T. melanogaster	22	6	2006	2	2	46	14		15.81	7.81	31.5
1597	Cuitzeo	T. melanogaster		7	2006	1	2	40	12		16.99	10.3	31.7
1506	Cuitzeo	T. melanogaster	27	4	2006	1	2	33	8.5		17.55	8.08	32
2009	Cuitzeo	T. melanogaster	18	8	2009	1	2	45	14	16.47	17.95	9.4	32.27
1562	Cuitzeo	T. melanogaster				1	2	48.3	10.2		15.22	9.22	32.3
1759	Cuitzeo	T. melanogaster	27	6	2008	1	2	46	10.5		17.42	6.8	32.4
2007	Cuitzeo	T. melanogaster	18	8	2009	1	2	46	12	17.61	15.2	9.92	32.47
2188	Cuitzeo	T. melanogaster	30	6	2010	2	2	42	10.7	16.22	16.42	7.93	32.76
1544	Cuitzeo	T. melanogaster	22	6	2006	2	2	42.5	14.5		14.08	7.72	33
1895	Cuitzeo	T. melanogaster	2	4	2009	1	2	42.5	13		13.76	9.29	33.2
1698	Cuitzeo	T. melanogaster	14	4	2008		2	39	12		14.71	10.26	33.4
1862	Cuitzeo	T. melanogaster	16	1	2009	1	2	39	9.5		17.74	9.3	33.7
2129	Cuitzeo	T. melanogaster	25	3	2010	1	2	41	14.3	16.2	17.91	8.28	35.23
1970	Cuitzeo	T. melanogaster	18	8	2009	1	2	38.3	12		17.26	10.19	35.52
2002	Cuitzeo	T. melanogaster	18	8	2009	1	2	46	13.4	16.64	14.6	9.27	35.97
2005	Cuitzeo	T. melanogaster	18	8	2009	1	2	41.5	13	16.13	17.98	9.84	36.39
1764	Cuitzeo	T. melanogaster	27	6	2008	2	2	57.5	13		17.65	6.8	36.5
1244 (2)	Cuitzeo	T. melanogaster	6	5	2005	2	1	26	32		15.97	5.77	36.8
1245 (2)	Cuitzeo	T. melanogaster	6	5	2005	2	2	37	10		16.37	9.19	37.2
2013	Cuitzeo	T. melanogaster	18	8	2009	1	2	40	11.6	15.84	15.8	9.56	37.2
1826	Cuitzeo	T. melanogaster	24	10	2008	1	2	45	13		16.16	8.32	37.6
1920	Cuitzeo	T. melanogaster				1	2	41.5	13		16.85	8.02	38.06
1928	Cuitzeo	T. melanogaster				1	2	42.5	13		16.4	7.7	38.39
1592	Cuitzeo	T. melanogaster		7	2006	2	2	40	9.5		17.8	8.8	39.8
1765	Cuitzeo	T. melanogaster	27	6	2008	2	2	64.8	15		15.42	7.1	40.1
1999	Cuitzeo	T. melanogaster	18	8	2009	1	2	56	14.3	20.54	13.3	12	40.72
1936	Cuitzeo	T. melanogaster				1	2	44.5	11.4		16.43	10.02	40.88
1595	Cuitzeo	T. melanogaster		7	2006	1	2	39	11.5		18.11	11.4	41.1
1710	Cuitzeo	T. melanogaster	14	4	2008	1	2	41	10		16.83	9.66	41.1
2132	Cuitzeo	T. melanogaster	25	3	2010	1	1	24	7.4	9.93	17.41	7.16	41.13
2012	Cuitzeo	T. melanogaster	18	8	2009	1	2	43	11.5	18.69	11	9.89	41.26
1911	Cuitzeo	T. melanogaster	28	5	2009	1	2	41.5	12		19.15	9.2	42.17
1904	Cuitzeo	T. melanogaster	2	4	2009	2	2	41	11.5		20	11.36	42.3
2128	Cuitzeo	T. melanogaster	25	3	2010	2	1	26.5	6.8	11.01	18.02	7.48	42.84
1499	Cuitzeo	T. melanogaster	27	4	2006	2	2	38.5	13		17.13	9.22	43.3
1713	Cuitzeo	T. melanogaster	16	4	2008	2	2	42	11		18.4	9.01	43.4
1758	Cuitzeo	T. melanogaster	27	6	2008	2	2	55	12		13.79	9.8	43.4
1234 (2)	Cuitzeo	T. melanogaster	6	5	2005	2	2	46.5	6.5		16.08	9.67	43.9
1500	Cuitzeo	T. melanogaster	27	4	2006	2	2	44	12.5		18.5	6.83	44
1891	Cuitzeo	T. melanogaster	2	4	2009	1	2	45.5	11.5		18.1	13.17	44
1763	Cuitzeo	T. melanogaster	27	6	2008	1	2	57	13.8		19.29	7.4	44.6
2003	Cuitzeo	T. melanogaster	18	8	2009	1	2	49.5	16	18.82	16.96	10	45.66
2020	Cuitzeo	T. melanogaster	18	8	2009	2	2	52	4.2	19.84	15.81	12.08	46.99
1829	Cuitzeo	T. melanogaster	24	10	2008	1	2	44	12		18.67	9.02	47.6
2019	Cuitzeo	T. melanogaster	18	8	2009	1	2	50	15.1	16.82	16.52	11.39	48.29
1777	Cuitzeo	T. melanogaster	27	6	2008		2	52	11		16.9	6.6	48.5
2006	Cuitzeo	T. melanogaster	18	8	2009	1	2	43	14	19.24	16.76	10.82	48.59
1249 (2)	Cuitzeo	T. melanogaster	6	5	2005	2	2	42	13.5		16.27	7.41	49.8
2015	Cuitzeo	T. melanogaster	18	8	2009	1	2	46.1	14.2	16.55	16.38	9.2	50.69
1919	Cuitzeo	T. melanogaster				1	2	46	12		19	8.4	51.02
1762	Cuitzeo	T. melanogaster	27	6	2008	2	2	54	11.7		16.14	7.43	51.2
2201	Cuitzeo	T. melanogaster	17	8	2010	1	2	54.5	17.2	20.81	19.7	10.06	52.31
2014	Cuitzeo	T. melanogaster	18	8	2009	1	2	49.5	15.5	18.97	23.04	10.6	53.24
2008	Cuitzeo	T. melanogaster	18	8	2009	2	2	51	4	21.21	21.22	11.59	53.52
1905	Cuitzeo	T. melanogaster	2	4	2009	2	2	51.5	10.2		17.17	11.6	55.6
2191	Cuitzeo	T. melanogaster	30	6	2010	1	2	49	13.2	18.46	17.42	11.02	56.01
2192	Cuitzeo	T. melanogaster	30	6	2010	1	2	46.3	13.9	18.01	17	11.06	57.19
1700	Cuitzeo	T. melanogaster	14	4	2008	1	2	46	13		16.47	10.07	58.2
1591	Cuitzeo	T. melanogaster		7	2006	2	2	50	15		19.66	10.6	58.7
1798	Cuitzeo	T. melanogaster	4	9	2008	1	2	58	15		20.8	8.7	60.5
1873	Cuitzeo	T. melanogaster	16	1	2009	1	2	51.5	12.5		19.55	10.1	61.8
1896	Cuitzeo	T. melanogaster	2	4	2009	1	2	44.5	15.3			15.09	63.7
2217	Cuitzeo	T. melanogaster	16	3	2011	2	2	45	11.5	18.02	24.22	9.31	64.7
1840	Cuitzeo	T. melanogaster	24	10	2008	1	2	57	15		23.5	11.28	67
2010	Cuitzeo	T. melanogaster	18	8	2009	2	2	51.4	10	18.35	27.36	11.89	67.23
1872	Cuitzeo	T. melanogaster	16	1	2009	2	2	56	15			9.3	74.2
2018	Cuitzeo	T. melanogaster	18	8	2009	1	2	50.5	16.5	17.75		9.6	76.56
1886	Cuitzeo	T. melanogaster	16	1	2009	1	2	52.8	12.4				76.6
2211	Cuitzeo	T. melanogaster	16	3	2011	2	2	56	12.5	10.42		12.32	76.9
1871	Cuitzeo	T. melanogaster	16	1	2009	2	2	55.5	14.5			9.8	78.19
1593	Cuitzeo	T. melanogaster		7	2006	2	2	46.5	12			11	80
1617	Cuitzeo	T. melanogaster	22	3	2007	2	2	57	14.5			11.6	80.5
1971	Cuitzeo	T. melanogaster	18	8	2009	2	2	51.2	16.2			13.51	82.03
2135	Cuitzeo	T. melanogaster	20	5	2010	2	2	53		22.48		13.46	83.24
1503	Cuitzeo	T. melanogaster	27	4	2006	2	2	48	12			12.54	84.4
1902	Cuitzeo	T. melanogaster	2	4	2009	2	2	50	14.2			14.15	84.6
2016	Cuitzeo	T. melanogaster	18	8	2009	2	2	58	14.7	21.63		13.56	97.11
1887	Cuitzeo	T. melanogaster	16	1	2009	2	2	58.2	15.1			21.61	101.9
1590	Cuitzeo	T. melanogaster		7	2006	1	2	66	19			15.6	104.4
1258 (2)	Cuitzeo	T. melanogaster	6	5	2005	2	2	51	13			12.72	106
1870	Cuitzeo	T. melanogaster	16	1	2009	2	2	56	14			11.6	106.17
2193	Cuitzeo	T. melanogaster	30	6	2010	2	2	58	11.5	23.02		11.79	108.4
1257 (2)	Cuitzeo	T. melanogaster	6	5	2005	2	2	50	15			12.78	110.4
2017	Cuitzeo	T. melanogaster	18	8	2009	2	2	56	16	21.44		12.45	116.15
2218	Cuitzeo	T. melanogaster	16	3	2011	2	2	58.5	15.6	21.7		12.91	116.3
2134	Cuitzeo	T. melanogaster	20	5	2010	2	2	57	13.5	20.1		12.92	146.81
2123	Cuitzeo	T. melanogaster	21	10	2009	2	2	64	11.7	21.95		13.67	178.09
2000	Cuitzeo	T. melanogaster	18	8	2009	2	2	64	17.5				196.06

## Sheet: scalaris
number snake	localidad asignada	Especie	DAY	MONTH	YEAR	Sex	Size category	SVL (cm)	Tail length (cm)	snout length (mm)	head length (mm)	head wide	mass (gr.)
1470	2	T. scalaris	15	10	2005	2	1	21.4	3.3		10.36	8.02	5.8
1471	2	T. scalaris	15	10	2005	2	1	19.7	5.3		12.71	8.64	6.4
1494	2	T. scalaris	29	10	2005	2	1	22.4	4.5		11.28	7.87	7
1442	2	T. scalaris	24	9	2005	1	1	22.2	4.8		11.21	8.73	7.1
1472	2	T. scalaris	15	10	2005	2	1	20.3	4.5		9.05	8.02	7.2
1489	2	T. scalaris	29	10	2005	2	1	22	4.5		16.06	5.85	7.6
1493	2	T. scalaris	22	10	2005	2	1	23.5	5.3		9.72	6.23	7.9
1443	2	T. scalaris	24	9	2005	1	1	23.5	4.3		8.43	9.55	8
1486	2	T. scalaris	29	10	2005	2	1	23.5	5.2		11.93	6.45	8.7
1492	2	T. scalaris	29	10	2005	2	1	25	5		10.96	8.23	9.7
1474	2	T. scalaris	15	10	2005	2	1	23.7	4.9		12.94	9.68	10.1
1491	2	T. scalaris	5	11	2005	2	1	23	4.3		10.75	6.65	10.2
2194	2	T. scalaris	7	7	2010	1	1	25.5	10.4	11.84	12.43	7.3	11.19
1462	2	T. scalaris	1	10	2005	2	1	29	5.4		13.07	8.59	14.9
1461	2	T. scalaris	24	9	2005	2	2	33.9	7.3		11.28	10.67	16.1
1451	2	T. scalaris	26	8	2005	2	1	28.1	11		12.8	10.46	16.7
1487	2	T. scalaris	22	10	2005	2	1	31.6	7.8		12.9	9.38	17.2
1473	2	T. scalaris	15	10	2005	2	2	35.3	12.9		10.81	11.16	18
1495	2	T. scalaris	29	10	2005	2	1	30.3	7.5		12.97	8.97	18.4
1458	2	T. scalaris	31	8	2005	2	2	36.1	10.4		13.9	9.83	20.6
1490	2	T. scalaris	22	10	2005	2	2	38.6	9.6		15.07	10.88	22.3
1488	2	T. scalaris	29	10	2005	2	2	39	9.3		16.16	11.13	25.2
1452	2	T. scalaris	26	8	2005	2	2	42	11		18.82	13.3	27.7
1460	2	T. scalaris	24	9	2005	1	2	35	9.5		17.01	10.12	27.8
1440	2	T. scalaris	24	9	2005	2	2	36.5	5.4		15.7	13.5	34.4
1450	2	T. scalaris	26	8	2005	2	2	50.3	13		18.34	15.5	58.8
1310	5	T. scalaris	5	6	2005		1	12.5	3.5		9.9	1.5	1.6
1326	5	T. scalaris	3	6	2005		1	13.5	3.8		9.73	5.76	1.6
1313	5	T. scalaris	5	6	2005		1	12.1	3.1		9.2	5.64	1.8
1311	5	T. scalaris	5	6	2005		1	16	3.4		10.15	1.85	2.3
1312	5	T. scalaris	5	6	2005		1	16.2	4.6		11.34	5.44	3
1449	5	T. scalaris	26	8	2005	2	1	19.9	4.6			7.87	5
1456	5	T. scalaris	16	9	2005	2	1	20	4.2		11.6	7.15	5.2
1445	5	T. scalaris	16	9	2005	2	1	19.5	4.3		12.33	8.85	5.4
1307	5	T. scalaris	5	6	2005	1	1	19.5	3.5		10.7	4.3	6
1309	5	T. scalaris	5	6	2005	2	1	27.9	7.3		11.54	4.89	9.2
1308	5	T. scalaris	5	6	2005		1	24.5	5.2		11.42	3.04	9.3
1482	5	T. scalaris	21	10	2005	2	1	26.2	7.9		11.84	10.2	11.6
1444	5	T. scalaris	16	9	2005	2	1	29	2.8		14.27	10.6	11.9
1481	5	T. scalaris	21	10	2005	2	1	29.8	8.5		13.7	11.91	16.1
1232	5	T. scalaris	13	10	2003	2	1	21	4.5		12	6.25	19.25
1483	5	T. scalaris	21	10	2005	2	2	33.9	8.7		16.21	12.88	24.6
1484	5	T. scalaris	21	10	2005	2	2	35.5	8.9		13.71	13.33	27.2
1233	5	T. scalaris	13	10	2003	1	2	36	9.5		14.65		29.9
1242	5	T. scalaris	12	12	2003	2	1	33.3	7.1		17.08	8.9	37.2
1236	5	T. scalaris	6	11	2003	2	1	31	7.5		20.36	7.1	38.5
1346	5	T. scalaris	7	6	2005	2	2	37.5	8.6		10	11.51	39.5
1243	5	T. scalaris				2	2	39	6.7		17.11	7.72	40.9
1345	5	T. scalaris	7	6	2005	2	2	38.2	8.7		18.66	11.58	42.7
1319	8	T. scalaris	3	6	2005		1	12.4	4.5		7.2	5.67	1.3
1321	8	T. scalaris	3	6	2005		1	13	4.5		10.31	6.22	1.3
1320	8	T. scalaris	3	6	2005		1	13.3	3.6		9.89	5.79	1.4
1322	8	T. scalaris	3	6	2005		1	13.7	3.4		11.2	5.89	1.5
1324	8	T. scalaris	3	6	2005		1	14.1	4.6		11.13	6.07	1.6
1318	8	T. scalaris	3	6	2005		1	14.1	4.1		10.43	6.85	1.7
1323	8	T. scalaris	3	6	2005		1	13.4	3.5		10.39	6.34	1.9
1296 (2)	8	T. scalaris	3	6	2005	2	1	30.6	8.5		9.82	10.06	10.4
1306	8	T. scalaris	3	6	2005		1	30.5	4.8		13.24	7.75	12.2
1446	8	T. scalaris	26	8	2005	2	1	30.6	11.4		14.78	9.37	12.9
1302	8	T. scalaris	3	6	2005	2	1	31.7	11.2		11.91	9.69	13.1
1447	8	T. scalaris	26	8	2005	2	1	30	9.6		13.21	8.04	13.5
1295 (2)	8	T. scalaris	3	6	2005	2	1	32.5	10		13.19	10.42	13.7
1303	8	T. scalaris	3	6	2005	2	1	32.6	12.5		8.5	9.37	15.4
1448	8	T. scalaris	26	8	2005	2	1	33.1	10.2		11.65	9.15	15.5
1455	8	T. scalaris	26	8	2005	2	2	34.3	13.6		13.96	10.53	16.2
1463	8	T. scalaris	26	8	2005	2	2	36.1	14.9		13.5	10.62	16.2
1464	8	T. scalaris	26	8	2005	2	2	35.4	15.1		15.4	11.18	17.5
1304	8	T. scalaris	3	6	2005	2	1	33.5	13.5		12.35	9.76	17.9
1297 (2)	8	T. scalaris	3	6	2005	2	2	35.5	9.9		14.7	12.43	18
1300	8	T. scalaris	3	6	2005	2	1	33.5	14.7		12	9.6	18
1305	8	T. scalaris	3	6	2005	2	2	36.5	14.2		12	11.57	18.6
1299 (2)	8	T. scalaris	3	6	2005	2	2	36.1	16.9		13.76	11.01	20.4
1465	8	T. scalaris	26	8	2005	2	2	36.5	10		9	12.57	23
1466	8	T. scalaris	26	8	2005	2	2	36.8	14.4		13.19	10.95	23.1
1468	8	T. scalaris	26	8	2005	2	2	36.3	11.4		13	11.61	23.4
1469	8	T. scalaris	26	8	2005	2	2	36.1	15.7		14.5	10.92	23.5
1298 (2)	8	T. scalaris	3	6	2005	2	2	38.5	13.7		13.74	11.65	25.4
1467	8	T. scalaris	26	8	2005	2	2	38.6	10.9		15.96	13.18	30.3
1301	8	T. scalaris	3	6	2005	2	2	40.5	11.2		13.21	11.17	31.1
1454	8	T. scalaris	26	8	2005	2	2	53	12		23.8	17.41	60.7
